1        ***Plasmodium* male gametocyte development and transmission are critically regulated by**  
2                    **general and transmission-specific members of the CAF1/CCR4/NOT complex**

3  
4    Kevin J. Hart<sup>1</sup>, Jenna Oberstaller<sup>2</sup>, Michael P. Walker<sup>1</sup>, Allen M. Minns<sup>1</sup>, Mark F. Kennedy<sup>1</sup>, Ian  
5    Padykula<sup>2</sup>, John H. Adams<sup>2</sup>, and Scott E. Lindner<sup>1\*</sup>

6  
7  
8  
9    <sup>1</sup> Department of Biochemistry and Molecular Biology, Center for Malaria Research, Pennsylvania  
10   State University, University Park, Pennsylvania 16802

11   <sup>2</sup> Center for Global Health and Infectious Diseases Research, Department of Global Health,  
12   University of South Florida, 3720 Spectrum Blvd, Suite 404, Tampa, Florida 33612

13  
14   \* Corresponding author

15   E-mail: Scott.Lindner@psu.edu (SEL)

16  
17   Short Title: Regulation of *Plasmodium* gametocytes by CAF1/CCR4/NOT

18

19 **ABSTRACT**

20 With relatively few known specific transcription factors to control the abundance of specific  
21 mRNAs, *Plasmodium* parasites also regulate the stability and turnover of transcripts to provide  
22 more comprehensive gene regulation. *Plasmodium* transmission stages impose translational  
23 repression on specific transcripts in part to accomplish this. However, few proteins are known  
24 to participate in this process, and those that are characterized primarily affect female  
25 gametocytes. We have identified and characterized PyCCR4-1, a putative deadenylase, which  
26 plays a role in the development and activation of male gametocytes, regulates the abundance  
27 of specific mRNAs in gametocytes, and ultimately increases the efficiency of host-to-vector  
28 transmission. We find that when *pyccr4-1* is deleted or its protein made catalytically inactive,  
29 there is a loss in the initial coordination of male gametocyte maturation and a reduction of  
30 parasite infectivity of the mosquito. Expression of only the N-terminal CAF1 domain of the  
31 essential CAF1 deadenylase, which prevents PyCCR4-1 association with the complex, leads to a  
32 similar phenotype. Comparative RNA-seq revealed that PyCCR4-1 affects transcripts important  
33 for transmission-related functions that are associated with male or female gametocytes, some  
34 of which directly associate with the immunoprecipitated complex. Finally, circular RT-PCR of  
35 one of the bound, dysregulated transcripts showed that PyCCR4-1 does not have gross changes  
36 in UTR or poly(A) tail length. We conclude that general and transmission-specialized members  
37 of the CAF1/CCR4/NOT complex play critical and intertwined roles in gametocyte maturation  
38 and transmission.

39

40 **AUTHOR SUMMARY**

41 Malaria is a disease caused by *Plasmodium* parasites, which are transmitted during an  
42 infectious blood meal by anopheline mosquitoes. Transmission of the sexual stages of the  
43 parasite to mosquitoes requires the proper regulation of specific mRNAs. While much work has  
44 been done to characterize regulation of mRNAs in female gametocytes, little has been done to  
45 assess this regulation in male gametocytes. Here, we demonstrate that PyCCR4-1, a member of  
46 the CAF1/CCR4/NOT RNA metabolic complex, acts upon transcripts both directly and indirectly  
47 in both male and female parasites, and results in a reduction of male gametocytemia. In  
48 gametocytes lacking PyCCR4-1, as well as those expressing a catalytically dead variant, the  
49 initial coordinated wave of male gametocyte activation is lost, and these parasites are less able  
50 to productively infect mosquitoes. We find that PyCCR4-1 requires its association with PyCAF1  
51 and by proxy, the rest of the complex, in order to perform its functions based upon  
52 experiments in both *Plasmodium yoelii* and *Plasmodium falciparum*. We also find that the  
53 CAF1/CCR4/NOT complex is directly binding some of these transcripts and is likely acting both  
54 directly and indirectly to modulate transcript abundance. These findings demonstrate that the  
55 combined effects of the CAF1/CCR4/NOT complex upon specific mRNAs are important for both  
56 male and female gametocytes, and that this regulation is required for efficient transmission to  
57 the mosquito vector.

58

## 59 INTRODUCTION

60 Malaria remains one of the great global health problems today, with 216 million new infections  
61 and 445,000 deaths attributed to it annually (1). Resistance to frontline drugs is spreading, and  
62 understanding the development and transmission of the malaria parasite is important to  
63 bolster efforts to reduce or eliminate deaths due to this infection. For the parasite to transmit  
64 from a vertebrate host to the mosquito vector, a small percentage of the cells will differentiate  
65 from asexual forms and develop into sexual stage gametocytes, which can persist in an  
66 infectious state until a mosquito takes a blood meal. This event allows a small number of  
67 gametocytes to be taken up into the mosquito, but with far fewer parasites productively  
68 infecting it (2). Following two weeks of development within the mosquito, a small number of  
69 sporozoites will similarly be injected into a host by the mosquito as it takes another blood meal  
70 (3). In the effort to develop vaccines and drugs, transmission events have been identified as  
71 prime targets because they are population bottlenecks in the parasite life cycle. We and others  
72 have focused upon the transmitted gametocyte and sporozoite stages of *Plasmodium* parasites  
73 to identify and exploit their weaknesses. In both cases, very few parasites are transmitted, and  
74 thus these bottlenecks are excellent points of intervention. The identification of molecular  
75 processes that are important for the transmission of the parasite in one or both of these  
76 events, and their modes-of-action, are thus top priorities for the development of new  
77 therapeutics.

78 Recent work has shown that the parasite requires tight transcriptional and translational control  
79 to navigate these complex transmission events (4-8). Despite the complex events required for  
80 the effective transmission of the parasite, *Plasmodium* has only one known, expanded family of

81 specific transcription factors, the ApiAP2 proteins (reviewed in (9)). In *Plasmodium*, other ways  
82 to regulate gene expression that act post-transcriptionally to control translation, and to  
83 stabilize or degrade RNA, thus have increased importance (5, 10). For instance, the parasite  
84 utilizes RNA-binding proteins (e.g. DOZI, CITH) to impose translational repression and mRNA  
85 stabilization on transcripts in female gametocytes that are produced long before they are  
86 needed to establish a new infection of a mosquito (10-15). DOZI (Development of Zygote  
87 Inhibited) is a DDX6 RNA helicase that is homologous with yeast DHH1 and human rck/p54, and  
88 CITH is a Lsm14 homolog of worm CAR-I and fly Trailer Hitch. A current model invokes these  
89 controls as a means for the parasite to always be ready to respond to external stimuli that  
90 indicate that transmission has occurred, and thus enables the rapid translation of the preserved  
91 mRNAs and establishment of the new infection (16). Moreover, this molecular process is  
92 essential to the parasite, as genetic deletion of *dozi* or *cith* results in a complete halt of  
93 development in early mosquito stage (13, 14). Similar regulatory events occur in the other  
94 transmitted stage (sporozoites) via the PUF2 RNA-binding protein, as deletion of *puf2* results in  
95 the gradual loss of infectivity and subsequent premature dedifferentiation into a liver stage-like  
96 form while in the salivary gland (7, 8, 17). As in model eukaryotes, many of these regulatory  
97 functions of RNA metabolism occur in cytosolic granules within the parasite as well (13, 14, 17,  
98 18).

99 In addition to transcript stabilization, translational control can also be accomplished by  
100 degrading specific transcripts in a process typically initiated by deadenylases. This is  
101 accomplished by the degradation of the poly(A) tail that regulates the stability of the mRNA.  
102 Shortening the poly(A) tail to a critical length in turn promotes the subsequent decapping and

103 complete degradation of the transcript by other factors (19, 20). In model eukaryotes, the main  
104 complex responsible for deadenylation is the CAF1/CCR4/NOT complex, which also participates  
105 in transcriptional elongation, translational repression, and histone modification functions, and  
106 thus acts broadly upon gene expression (20). This complex typically contains two putative  
107 deadenylases, with CAF1 (CCR4-Associated Factor 1) serving as the major deadenylase and  
108 CCR4 (Carbon Catabolite Repressor 1) playing additional or specialized roles, except for in yeast  
109 where the roles are reversed (20). While CAF1's role in binding to and degrading poly(A) tracts  
110 is best appreciated, it has been shown to bind several other poly-nucleotide tracts (21).  
111 Recently, a cryo EM structure of the *S. pombe* CAF1/CCR4/NOT complex was reconstructed  
112 using immunoprecipitated material. This work confirmed previous studies that used  
113 recombinant proteins and binding assays to show that the complex is L-shaped, that NOT1  
114 (Negative on TATA-less) acts as the scaffold, and that CCR4 binds to the complex indirectly  
115 through bridging interactions with CAF1 (21-23). While these associations and activities have  
116 been well described in model eukaryotes, little is known about the CAF1/CCR4/NOT complex's  
117 form and function in malaria parasites.

118 In *Plasmodium*, previous work confirmed that normal deadenylase activity provided by CAF1 is  
119 essential for asexual blood stage growth (24, 25). Interestingly, insertion of a *piggyBac*  
120 transposon into the coding sequence revealed that CAF1 contributes to the regulation of  
121 invasion and egress-related genes in asexual blood stage parasites (24). It is possible that this  
122 transposon insertion still results in the production of a partially functional CAF1 protein.  
123 Multiple independent attempts to knock out *caf1* in the rodent-infectious species *P. berghei*  
124 failed, indirectly indicating that it is essential for parasite development (24, 26). Moreover,

125 previous work on *Plasmodium* sporozoites identified that deletion of *pypuf2* led to significant  
126 changes in the transcript abundance of several members of the CAF1/CCR4/NOT complex (6,  
127 27). Among the affected transcripts, two mRNAs encoding CCR4 domain-containing proteins  
128 were dysregulated. As the deadenylase proteins of the CAF1/CCR4/NOT complex have been  
129 shown to be specialized regulators in other species, we investigated the possibility that CCR4  
130 domain-containing proteins may be acting in this capacity in *Plasmodium* as well (28, 29).

131 Here, we demonstrate that CCR4-1 is a specialized regulator during gametocytogenesis and  
132 transmission of the rodent-infectious *Plasmodium yoelii* parasite from the mammalian host to  
133 the mosquito vector. Deletion of *pyccr4-1*, or expression of a putatively catalytic dead variant,  
134 resulted in a loss of the initial synchronous development of male gametocytes that can activate  
135 into gametes, as well as a reduction in the total number of mature male gametocytes.

136 Moreover, deletion of *pyccr4-1* also reduced the transmissibility of the parasite to the mosquito  
137 on both peak and post-peak transmission days, indicating that PyCCR4-1's functions extend  
138 beyond its role in the synchronization of gametocytes. Comparative transcriptomics of wild-  
139 type and *ccr4-1* gametocytes revealed that PyCCR4-1 significantly impacts the abundance of  
140 transcripts that are translationally repressed in female gametocytes, and those that impact the  
141 transmission to and establishment of an infection in the mosquito. We found that PyCCR4-1  
142 binds directly to some of these affected transcripts and allows for increased transcript  
143 abundance without affecting UTR or poly(A) tail length. Surprisingly, this effect runs counter to  
144 the major canonical role of a deadenylase. Finally, proteomic characterizations and genetic  
145 modifications of *pycaf1* and *pfcaf1* indicate that PyCCR4-1 must associate with the canonical

146 CAF1/CCR4/NOT complex in order to properly regulate transcripts associated with gametocyte  
147 development and to promote host-to-vector transmission.

148

## 149 **RESULTS**

### 150 **PyCCR4-1 localizes to discrete cytosolic granules**

151 In model eukaryotes, CCR4 performs many of its functions while in association with the other  
152 members of the CAF1/CCR4/NOT complex and is found in nuclear and cytosolic granular  
153 structures (19). Using immunofluorescence and live fluorescence assays with transgenic  
154 PyCCR4-1::GFP parasites, we observed that PyCCR4-1 localized to cytoplasmic puncta in asexual  
155 blood stage parasites, and is similarly localized in both male and female gametocytes (Figure 1,  
156 Fig S1AB). Moreover, this expression profile extends to oocysts, oocyst sporozoites, and salivary  
157 gland sporozoites, where PyCCR4-1 was seen both in cytosolic puncta and located diffusely  
158 throughout the parasite (Fig S1CD). However, PyCCR4-1 was not detected above background in  
159 liver stage parasites. Thus, the near constitutive expression and localization of PyCCR4-1 in  
160 cytoplasmic foci in *Plasmodium* resembles that of its orthologues in model eukaryotes.

161

### 162 **PyCCR4-1 associates with a canonical CAF1/CCR4/NOT complex**

163 Bioinformatically, we identified the genes for all members of the canonical CAF1/CCR4/NOT  
164 complex in *Plasmodium*, except for *not3* and *caf130*. The absence of these two particular genes  
165 is not surprising, as these genes are also absent in humans and *Drosophila* (19). In addition, we



166 identified three other CCR4 domain-containing proteins (PyCCR4-2, PyCCR4-3, PyCCR4-4)  
167 (Figure S2A). Total proteomics of mixed blood stage samples of *P. yoelii* wild-type and *pyccr4-1*  
168 parasite lines indicated that many of these bioinformatically defined members (NOT1, NOT4,  
169 NOT5, NOT Family Protein, CAF40) are expressed at levels that permit their detection, whereas  
170 CCR4-1 and CAF1 were not sufficiently abundant to be detected using highly stringent  
171 thresholds (Table S1).

172 To experimentally determine the composition of this complex in *Plasmodium yoelii*, the C-  
173 terminal GFP tag on PyCCR4-1::GFP was utilized to immunoprecipitate the CAF1/CCR4/NOT  
174 complex from synchronized schizonts, when PyCCR4-1 is most abundant and is most  
175 prominently localized to cytoplasmic granules. As seen in model organisms, PyCCR4-1  
176 associates, directly or indirectly, with most members of the canonical CAF1/CCR4/NOT complex  
177 in *P. yoelii* (Table 1, Table S2) (20). Specifically, we found that PyCCR4-1 associates with CAF1,  
178 NOT1, CAF40, NOT2 and a NOT family protein above our most stringent SAINT (Significance  
179 Analysis of INTeractome) threshold (0.1), and with NOT5 using a less stringent threshold (0.1 to  
180 0.35). A small number of peptide spectral matches for NOT4 were also observed, but were not  
181 sufficiently enriched to be confidently included. This low abundance of NOT4 is consistent with  
182 its known transient association with the CAF1/CCR4/NOT complex in other eukaryotes (30). We  
183 also found that PyCCR4-1 interacts with proteins involved in the nuclear pore complex and RNA  
184 export (e.g. karyopherin-beta 3, exportin-1, UAP56), proteins involved in translation initiation  
185 (e.g. eIF2A, EF-1, EIF3D, PABP), and translational repression (e.g. CELF2/Bruno, DOZI, CITH,  
186 PABP) (Table 1, Table S2) (20). All of these interactions are consistent with appreciated  
187 CAF1/CCR4/NOT interactions in model eukaryotes. Recently, a proteome of stress granule

188 components in *S. cerevisiae* defined several cytosolic granule regulators, several of which we  
189 also found associated with PyCCR4-1 (31). Specifically, we identified that multiple CCT proteins  
190 of the TRiC complex (e.g. CCT4, CCT5, CCT8) and HSP40-A associate (SAINT score < 0.1), and this  
191 list expands to include the remainder of the TRiC core complex(e.g. TCP1, CCT2, CCT3, CCT6,  
192 CCT7) and a regulatory kinase (CK1) (SAINT scores between 0.1 to 0.35). In addition, recent  
193 work has implicated karyopherins/nuclear import receptors in the regulation of proteins found  
194 within liquid-liquid phase separations/cytosolic granules (32). Here, we identified that  
195 karyopherin beta 3 associates with the *P. yoelii* CAF1/CCR4/NOT complex, and perhaps  
196 indicates that similar regulatory processes are at work. These data indicate that the  
197 composition of the CAF1/CCR4/NOT complex, including the presence of cytosolic granule  
198 regulators, are likely conserved from model eukaryotes to *Plasmodium*.

199

200 **Table 1:** Interacting proteins with PyCCR4-1::GFP and PyCAF1ΔC::GFP proteins.

| Gene ID                         | Name                                             | PyCCR4-1::GFP |                 |             | PyCAF1ΔC::GFP |                 |             |
|---------------------------------|--------------------------------------------------|---------------|-----------------|-------------|---------------|-----------------|-------------|
|                                 |                                                  | Spectra       | Control Spectra | SAINT Score | Spectra       | Control Spectra | SAINT Score |
| <b>CAF1/CCR4/NOT Complex</b>    |                                                  |               |                 |             |               |                 |             |
| PY17X_1237700                   | CCR4-1                                           | 127 112 22    | N/A             | N/A         | 0 0 0         | 0 0 0           | N/A         |
| PY17X_1027900                   | NOT family protein putative                      | 97 132 19     | 0 0 0           | 0           | 1 3 0         | 0 0 0           | 0.4873      |
| PY17X_0945600                   | NOT1                                             | 50 46 7       | 0 0 0           | 0           | 1 2 3         | 0 0 0           | 0.2637      |
| PY17X_1428300                   | CAF1                                             | 47 58 11      | 0 0 0           | 0           | 26 19 17      | N/A             | N/A         |
| PY17X_1108300                   | CAF40                                            | 17 20 7       | 0 0 0           | 0.0004      | 0 2 1         | 0 0 0           | 0.3506      |
| PY17X_0921700                   | NOT2                                             | 8 12 3        | 0 0 0           | 0.002       | 0 0 0         | 0 0 0           | N/A         |
| PY17X_1207500                   | NOT5                                             | 7 2 0         | 0 0 0           | 0.2196      | 0 0 0         | 0 0 0           | N/A         |
| PY17X_1452400                   | NOT4                                             | 0 1 0         | 0 0 0           | 0.8736      | 0 0 0         | 0 0 0           | N/A         |
| <b>Translational Repressors</b> |                                                  |               |                 |             |               |                 |             |
| PY17X_1220900                   | DOZI                                             | 12 13 4       | 0 0 0           | 0.0011      | 3 9 4         | 1 2 7           | 0.4504      |
| PY17X_1035100                   | CEL2                                             | 17 21 5       | 1 0 0           | 0.0037      | 1 12 9        | 0 0 6           | 0.2238      |
| <b>Stress Granule</b>           |                                                  |               |                 |             |               |                 |             |
| PY17X_0311400                   | CCT8                                             | 10 3 3        | 0 0 0           | 0.0131      | 3 19 15       | 1 0 8           | 0.2019      |
| PY17X_0613400                   | HSP40 subfamily A                                | 15 15 5       | 0 3 0           | 0.0368      | 2 17 12       | 0 1 6           | 0.2069      |
| PY17X_1135600                   | CCT4                                             | 12 5 1        | 1 0 0           | 0.0735      | 0 7 6         | 0 0 2           | 0.2134      |
| PY17X_0913800                   | TSN                                              | 7 10 1        | 1 0 0           | 0.0774      | 3 21 12       | 0 2 6           | 0.2097      |
| PY17X_1221400                   | CCT5                                             | 4 2 1         | 0 0 0           | 0.0847      | 0 8 4         | 1 1 4           | 0.3536      |
| PY17X_0822200                   | HSP70-2                                          | 17 8 5        | 3 0 0           | 0.0882      | 8 26 35       | 6 21 24         | 0.5228      |
| <b>Nuclear Transport</b>        |                                                  |               |                 |             |               |                 |             |
| PY17X_0307400                   | UAP56                                            | 9 4 6         | 0 0 0           | 0.0071      | 12 17 22      | 10 14 13        | 0.5413      |
| PY17X_0403700                   | exportin-1                                       | 8 12 2        | 0 1 0           | 0.033       | 8 20 10       | 2 1 8           | 0.168       |
| PY17X_1242000                   | karyopherin beta-3                               | 39 64 16      | 6 6 0           | 0.0525      | 45 86 89      | 20 37 59        | 0.476       |
| PY17X_1416100                   | exportin-1                                       | 3 4 2         | 0 0 0           | 0.0694      | 2 9 8         | 1 0 5           | 0.256       |
| <b>Translation</b>              |                                                  |               |                 |             |               |                 |             |
| PY17X_1209300                   | EIF3D                                            | 9 9 3         | 0 0 0           | 0.0028      | 2 18 15       | 2 4 8           | 0.2705      |
| PY17X_0926900                   | EF-1 subunit alpha                               | 4 6 3         | 0 0 0           | 0.0205      | 1 3 4         | 0 0 1           | 0.128       |
| PY17X_0504300                   | eIF2A                                            | 15 33 2       | 0 0 0           | 0.026       | 0 6 4         | 0 0 0           | 0.3075      |
| PY17X_0309700                   | peptide chain release factor subunit 1           | 3 2 2         | 0 0 0           | 0.057       | 2 3 4         | 0 1 0           | 0.0499      |
| PY17X_1034300                   | eIF2 gamma                                       | 3 3 1         | 0 0 0           | 0.0612      | 1 12 8        | 0 2 6           | 0.279       |
| PY17X_1369900                   | 60S ribosomal protein L17                        | 6 6 2         | 1 0 0           | 0.0653      | 1 9 4         | 2 2 6           | 0.4393      |
| <b>Other</b>                    |                                                  |               |                 |             |               |                 |             |
| PY17X_0933200                   | HSP101                                           | 15 13 10      | 0 0 0           | 0.0002      | 14 25 22      | 17 6 21         | 0.8288      |
| PY17X_0104900                   | putative anonymous antigen-1*                    | 17 19 3       | 0 0 0           | 0.0044      | 1 15 10       | 0 0 4           | 0.1823      |
| PY17X_0814600                   | Ran-binding protein                              | 8 7 4         | 0 0 0           | 0.0058      | 7 13 14       | 4 8 8           | 0.4982      |
| PY17X_1402200                   | cytoadherence linked asexual protein             | 12 8 3        | 1 0 0           | 0.0155      | 18 38 35      | 10 17 15        | 0.3512      |
| PY17X_0109000                   | OAT                                              | 5 4 3         | 0 0 0           | 0.0131      | 8 12 7        | 2 1 8           | 0.3583      |
| PY17X_1139200                   | glideosome-associated connector*                 | 34 30 5       | 0 4 0           | 0.0181      | 30 70 55      | 19 15 33        | 0.3619      |
| PY17X_1016400                   | coatamer protein beta subunit                    | 5 9 2         | 0 0 0           | 0.0226      | 3 10 11       | 0 4 5           | 0.2887      |
| PY17X_1322200                   | 6-phosphogluconate dehydrogenase decarboxylating | 6 8 1         | 0 0 0           | 0.0294      | 2 7 7         | 0 1 2           | 0.1208      |
| PY17X_1313800                   | M17 leucyl aminopeptidase putative               | 7 2 2         | 0 0 0           | 0.0405      | 4 8 8         | 5 2 9           | 0.5377      |
| PY17X_0833500                   | RhopH2                                           | 18 12 13      | 1 3 0           | 0.0441      | 25 58 53      | 16 22 31        | 0.4018      |
| PY17X_0418800                   | RhopH3                                           | 20 9 6        | 3 0 0           | 0.0479      | 12 46 34      | 10 14 18        | 0.3455      |

|               |                                               |       |       |        |          |        |        |
|---------------|-----------------------------------------------|-------|-------|--------|----------|--------|--------|
| PY17X_0708300 | SEC23                                         | 2 6 2 | 0 0 0 | 0.0811 | 13 11 12 | 5 4 12 | 0.5213 |
| PY17X_0525700 | tryptophan/threonine-rich antigen             | 2 2 2 | 0 0 0 | 0.0915 | 0 6 4    | 9 0 4  | 0.534  |
| PY17X_1411400 | meiosis-specific nuclear structural protein 1 | 2 2 3 | 0 0 0 | 0.0949 | 0 0 0    | 0 0 0  | N/A    |
| PY17X_0621600 | putative hydrolase/p36 like protein*          | 5 1 1 | 0 0 0 | 0.0988 | 3 14 11  | 1 2 4  | 0.1966 |

201

## 202 **PyCCR4-1 is important for the development and transmission of male gametocytes**

203 As deadenylases are also known to act as translational regulators in specific and temporal  
204 manners, we investigated the role of all members of the CCR4 domain-containing protein family  
205 throughout the *Plasmodium* life cycle. Utilizing BLASTp alignments, we identified four high-  
206 confidence CCR4 domain-containing proteins in *Plasmodium* spp. that all have homology to  
207 deadenylases in other model eukaryotes (e.g. Yeast, Human, Mouse) (Figure S2AB). The domain  
208 architecture of CCR4-like proteins involves a Leucine Rich Repeat Region (LRR) and an  
209 Endonuclease/Exonuclease/Phosphatase (EEP) domain. The LRR mediates the interaction of  
210 CCR4 with CAF1 and the rest of the NOT complex, while the EEP domain contains active site  
211 residues required for deadenylation activity. Of these, we found that the EEP domain of  
212 PyCCR4-1 aligns most closely with the consensus CCR4 domain-containing proteins from model  
213 eukaryotes. However, beyond the CCR4-EEP domain, there is no significant homology between  
214 other regions from PyCCR4-1, 2, 3, and 4 to each other, or to homologues from model species  
215 (Figure S2B) (33). While a canonical LRR was not bioinformatically detectable in any of the  
216 CCR4 domain-containing proteins, immunoprecipitation of PyCCR4-1::GFP demonstrated that it  
217 retains the ability to associate with its complex (Table 1).

218 As our recent RNA-sequencing data from *Plasmodium yoelii* shows that all four genes are  
219 expressed in asexual blood stages and in gametocytes (4), we sought to determine if any of the  
220 CCR4 domain-containing proteins played an important, stage-specific role in the parasite life  
221 cycle. To this end, we replaced their coding sequences with a GFP-expression cassette and a  
222 human dihydrofolate reductase (HsDHFR)-expression cassette via double homologous  
223 recombination in the *Plasmodium yoelii* 17XNL strain (Figures S2CDEF). These lines were cloned

224 via limiting dilution prior to characterization and their transgenic genotypes were confirmed  
225 using PCR across both homology regions. These clonal parasites revealed that deletion of any  
226 one of these genes individually was not lethal in asexual blood stages.

227 As CCR4 proteins are known to play specialized roles in eukaryotes, transgenic parasites lacking  
228 one of the four genes (*pyccr4-1*, *pyccr4-2*, *pyccr4-3*, *pyccr4-4*) were also compared to wild-type  
229 parasites in all stages of the parasite's life cycle. Phenotypic observations were performed by  
230 measuring parasite numbers, prevalence of mosquito infection, and developmental  
231 timing/completion throughout the *Plasmodium* life cycle (Figure 2, Figure S3, Table S3).

232 Deletion of *pyccr4-2*, *pyccr4-3*, or *pyccr4-4* resulted in transgenic parasites that behaved as  
233 wild-type in all life cycle stages (Table S3).

234 However, while deletion of *pyccr4-1* had no effect upon asexual blood stage growth (Figure  
235 S3A), it led to significant effects during male gametocyte maturation and host-to-vector  
236 transmission (Figure 2). First, to assess gametocytogenesis and the number of mature male  
237 gametocytes present, we developed an antibody-based flow cytometry assay based in part  
238 upon the effective reporter system (820cl1m1cl1) commonly used in *P. berghei* (14). We  
239 generated antibodies against a recombinant domain variant of dynein heavy chain delta (PyDD,  
240 PY17X\_0418900, "PyDDD" = AA1845-2334), and together anti-PvBiP antibodies to counterstain  
241 cells containing a parasite, we confirmed by flow cytometry and giemsa staining that PyDD is a  
242 marker for mature male gametocytes in *P. yoelii*, as it is in *P. berghei* This was further validated  
243 using a transgenic parasite line with a PyDDprom::GFPmut2 cassette integrated in the *p230p*  
244 safe harbor locus, where the population positive for both anti-PyDD and anti-GFP signals highly  
245 overlapped (Figure S3B). Ultimately, this approach allows these measurements to be done

246 without the need to conduct reverse genetics in a base fluorescent reporter line, and frees GFP  
247 and RFP for other purposes.

248 Using this flow cytometric method, we found that transgenic *pyccr4-1*<sup>-</sup> parasites produce fewer  
249 mature male gametocytes compared to wild-type parasites (Figure 2B, Figure S3D). Secondly, in  
250 contrast to wild-type parasites that have a semi-synchronous wave of gametocyte  
251 development, *pyccr4-1*<sup>-</sup> parasites lose this coordination and instead develop fewer male  
252 gametocytes that can form gametes, and do so in an asynchronous manner (Figure 2B).

253

#### 254 **The putative catalytic residues of PyCCR4-1 are required for its roles in gametocytogenesis** 255 **and transmission**

256 CCR4 proteins have well defined, conserved catalytic residues in model eukaryotes that are also  
257 conserved in *Plasmodium* species (Figure S2B) (34). To determine if the putative active site  
258 residues contribute to PyCCR4-1's functions in male gametocytes, we created transgenic  
259 parasites with alanine substituted for two of the putative catalytic residues (D1852A, H1898A)  
260 of PyCCR4-1 (dCCR4-1) (Figure S3C). Like *pyccr4-1*<sup>-</sup> parasites, dCCR4-1 transgenic parasites also  
261 produce fewer mature male gametocytes, and also lacked a synchronous wave of male  
262 activation (Figure 2 AC).

263 Because some male gametocytes retained the ability to mature and become exflagellating  
264 gametes in both the *pyccr4-1*<sup>-</sup> and dCCR4-1 lines, we assessed whether they were transmissible  
265 to mosquitoes. In both transgenic lines, we observed a corresponding decrease of similar scale  
266 in the number of day seven oocysts compared to wild-type parasites when transmitted to *An.*

267 *stephensi* on the peak day of male gametocyte activation into gametes (e.g. day five post-  
268 infection) (Figure 2D). Moreover, although there is no statistical difference in the number of  
269 male gametocytes that can activate between wild-type and *pyccr4-1* parasites after the peak  
270 day (Figure 2B, days six and beyond), a significant decrease ( $p < 0.05$ ) in the number of oocysts in  
271 the mosquito was still observed when parasites were transmitted two days post-peak (Figure  
272 S3E). These data indicate that the catalytic residues of PyCCR4-1 are required for normal male  
273 gametocyte development and host-to-vector transmission.

274

275 **Truncation of PyCAF1 prevents full assembly of the CAF1/CCR4/NOT complex and**  
276 **phenocopies the deletion of *pyccr4-1***

277 We next sought to determine if the typical association of PyCCR4 with the rest of its complex  
278 was required for its role in gametocyte development and host-to-vector transmission (35-37).  
279 As CCR4 domain-containing proteins associate with the NOT1 scaffold of the CAF1/CCR4/NOT  
280 complex indirectly by binding CAF1, genetic deletion of *caf1* would theoretically dissociate  
281 CCR4-1 from its complex. However, complete deletions of the *caf1* gene have been  
282 unsuccessful in both a conventional targeted attempt and in the PlasmoGEM broad-scale  
283 genetic screen in *P. berghei*, indicating that it is likely essential (24, 38). We have also  
284 attempted to completely delete the *P. yoelii caf1* coding sequence and similarly were unable to  
285 delete these sequences (Figure S4A). Instead, as the insertion of the *piggyBac* transposon into  
286 the *P. falciparum caf1* gene occurred in the coding sequence downstream of the CAF1 domain,  
287 we hypothesized that this portion of PfCAF1 may still be expressed and may be necessary (24).



288 In support of this hypothesis, transcript expression analysis of the *P. falciparum* CAF1 disruptant  
289 line (PfCAF1ΔC) bearing this transposon insertion indicated that the CAF1 domain was still  
290 transcribed up to the insertion site, but not after (Figure S4B).

291 Based upon these expression data, we created a *Plasmodium yoelii* transgenic line that mimics  
292 this transposon insertion by inserting a C-terminal GFP tag and stop codon in the *Plasmodium*  
293 *yoelii caf1* gene in a comparable location following the CAF1 domain, thus creating a PyCAF1ΔC  
294 (AA 1-335) variant (Figure S4C) (24). We found that expression of the PyCAF1ΔC::GFP variant  
295 resulted in viable parasites, but importantly, that these parasites exhibit a similar growth  
296 attenuation as was observed for the *P. falciparum* PfCAF1ΔC line (Figure 2E) (24). To further  
297 assess the impact of the PyCAF1ΔC variant upon parasite growth and transmission, we  
298 observed comparable, but more pronounced, effects upon the activation of male exflagellation  
299 and parasite transmission as was seen with *pyccr4-1* parasites (10-fold decrease in male  
300 activation on peak day and >4-fold reduction in transmission to mosquitoes, respectively)  
301 (Figure 2F). These exacerbated effects may be caused by the combined effects of a reduction in  
302 total parasite numbers due to the deletion of portions of PyCAF1 and a PyCCR4-1-dependent  
303 defect in male gametocyte development.

304 To determine if the PfCAF1ΔC variant in human-infectious *P. falciparum* similarly impairs  
305 gametocytogenesis as was seen in rodent-infectious *P. yoelii*, the PfCAF1ΔC *piggyBac*-insertion  
306 parasite line was assessed for effects upon parasitemia, gametocytogenesis, as well as male  
307 gametocyte activation. The PfCAF1ΔC line exhibited significant decreases in gametocyte  
308 conversion, total gametocytemia, and exflagellation on the peak day as compared to wild-type  
309 *P. falciparum* NF54 strain parasites (Figure 3A-D, Table S4). These data support the observed *P.*

310 *yoelii* phenotype and indicate that this conserved complex is important to sexual development  
311 across *Plasmodium* species.

312 As we hypothesized that expression of only the CAF1 domain would prevent proper assembly of  
313 the CAF1/CCR4/NOT complex, we used IP-MS to determine if PyCAF1 $\Delta$ C::GFP can still associate  
314 normally with its binding partners. We found that when *pycaf1* is disrupted in this manner, the  
315 resulting PyCAF1 $\Delta$ C protein does not associate with most of the components of the  
316 CAF1/CCR4/NOT complex, including PyCCR4-1 (Table 1, Table S5). Utilizing the same stringent  
317 SAINT score (<0.1) for each immunoprecipitation, we found that only two proteins (PyCAF1 $\Delta$ C  
318 itself, and subunit one of peptide chain release factor) are detected (Figure S5, Table S5). By  
319 expanding the SAINT threshold to 0.35, only 57 (41%) of PyCCR4-1::GFP's 139 protein  
320 interactions were detected. Importantly, we did not detect any association of PyCAF1 $\Delta$ C::GFP  
321 with PyCCR4-1 (no peptide spectral matches) and observed only a greatly reduced association  
322 with NOT1. These data suggest that PyCAF1 $\Delta$ C is no longer able to interact with PyCCR4-1,  
323 while only weakly associating with other members of the CAF1/CCR4/NOT complex. This  
324 dysregulation is further observed in both asexual and sexual stage parasites, as full-length  
325 PyCAF1::GFP was found localized in cytosolic puncta, whereas PyCAF1 $\Delta$ C::GFP was diffusely  
326 localized (Figure S6).

327 These changes in complex assembly caused by expression of the truncated PyCAF1 $\Delta$ C variant,  
328 which phenocopies the deletion of *pyccr4-1*, led us to several conclusions. First, only the CAF1  
329 domain of PfCAF1 and PyCAF1 is essential for parasite viability. Second, while portions of  
330 PfCAF1 and PyCAF1 C-terminal to the CAF1 domain are dispensable, they are critical for CAF1's  
331 association with its complex, and essential for recruiting CCR4-1. Finally, these data indirectly

332 suggest that PyCCR4-1 requires its association with PyCAF1 and the NOT complex in order to  
333 promote coordinated gametocytogenesis and efficient transmission to the mosquito.

334

### 335 **PyCCR4-1 affects important gametocyte and mosquito stage transcripts**

336 Because PyCCR4-1 is a putative deadenylase, we hypothesized that these phenotypes in male  
337 and possibly female gametocytes may be attributed to PyCCR4-1 affecting the abundance of  
338 specific transcripts important to gametocytogenesis, gamete activation, and/or parasite  
339 transmission to mosquitoes. To determine the role of PyCCR4-1 in the regulation of transcripts  
340 in gametocytes, total comparative RNA sequencing (RNA-seq) was performed. Gametocytes  
341 from a wild-type line expressing GFP from the *p230p* dispensable locus (WT-GFP) and the  
342 *pyccr4-1*<sup>-</sup> transgenic line were selected using sulfadiazine treatment, purified on an Accudenz  
343 gradient, and their RNA extracted for RNA-seq. Differential abundance of transcripts was  
344 assessed via DEseq2, and we utilized the p-adjusted value for all analyses (Figure 4A, Table S6)  
345 (39, 40).

346 Nearly all (172 of 175) of the significantly affected transcripts (P-adjusted < 0.05, > 2 fold  
347 change) between WT-GFP and *pyccr4-1*<sup>-</sup> parasites decreased in abundance in the *pyccr4-1*<sup>-</sup>  
348 parasites, while only 3 transcripts increased in overall abundance (Table S6). Many of these  
349 decreases in transcript abundance are for 55 mRNAs that encode male-enriched proteins, and  
350 thus these changes can likely be attributed to the production of fewer mature male  
351 gametocytes in the *pyccr4-1*<sup>-</sup> transgenic line. However, the effect upon other transcripts,  
352 including those associated with female gametocytes, cannot (Figure 4B). Most notably,

353 transcripts that encode proteins involved in gamete function (e.g. GEST) and early mosquito  
354 stage development (e.g. p28, CITH, AP2-O, HMGB2, LAP2) decreased in abundance significantly  
355 in the absence of PyCCR4-1. Moreover, many of these transcripts are known to be  
356 translationally repressed in *P. falciparum* female gametocytes (Figure 4B). Interestingly, an  
357 ApiAP2 protein (PY17X\_1417400) that is important for gene expression in gametocytogenesis  
358 decreased in abundance 10-fold in *pyccr4-1* gametocytes (41). Disruption of this ApiAP2 gene  
359 in *P. falciparum* by *piggyBac* transposon insertion resulted in the formation of no gametocytes  
360 (41). Other transcripts-of-interest that decreased in abundance are those that encode for  
361 multiple uncharacterized RNA-binding proteins (PY17X\_1203900, PY17X\_1457300,  
362 PY17X\_0923600), a second ApiAP2 protein (PY17X\_1317000) and BDP2 (PY17X\_1431000), an  
363 uncharacterized putative transcriptional activator (Table S6). Together, we conclude that these  
364 differences in transcript abundance reflect both a reduction in the number of mature male  
365 gametocytes, but also indicate that PyCCR4-1 is acting to preserve specific transcripts important  
366 for the gametocyte and early mosquito stage parasite.

367

368 **The CAF1/CCR4/NOT complex specifically binds transcripts that are dysregulated in *pyccr4-1***  
369 **parasites.**

370 As transcript abundances could be affected directly by PyCCR4-1 and its complex, or indirectly  
371 through compensatory mechanisms such as gene buffering when the *pyccr4-1* gene is deleted  
372 (42), we determined if these dysregulated mRNAs were bound by the CAF1/CCR4/NOT  
373 complex. To this end, unfused GFP (expressed in WT-GFP parasites) and PyCCR4-1::GFP were

374 immunoprecipitated from purified, transgenic gametocytes, and the association of co-  
375 precipitated transcripts was detected by RT-PCR. We found that PyCCR4-1::GFP interacted  
376 specifically with a number of selected transcripts that substantially change in abundance in  
377 *pyccr4-1*<sup>-</sup> parasites, including *p28* (PY17X\_0515900), *lap2* (PY17X\_1304300), and *nek3*  
378 (PY17X\_0603200) (Figure 5A, top row). These transcripts are notable, as they are all  
379 important/essential for gametocytogenesis or transmission, and include transcripts known to  
380 be important to male (*nek3*) and/or female (*p28*, *lap2*) gametocytes (43-47). However, not all  
381 dysregulated transcripts (*cith* and *ap2-o*), nor unaffected housekeeping transcripts (*gapdh*,  
382 *eif2b*) were found specifically associated with PyCCR4-1 (Figure 5A, bottom row), suggesting  
383 that these effects likely result from a combination of both direct and indirect effects upon  
384 specific transcripts.

385 The direct effects that CCR4 can have on transcript abundance in model eukaryotes have  
386 resulted from deadenylation of a target transcript, or through translational repression by  
387 binding/tethering to its complex(28). To investigate this, circular-RT PCR (cRT PCR) was used to  
388 determine if the UTR and poly(A) length of both a control transcript (*gapdh*, not affected by  
389 *ccr4-1* deletion, does not interact with CCR4-1), and an affected/bound transcript (*p28*) were  
390 impacted by PyCCR4-1. cRT PCR demonstrated that, upon *pyccr4-1* deletion, there were no  
391 gross effects on UTR/poly(A) tail lengths of these transcripts using primers that anneal near the  
392 start and stop codons (Figure 5BC, oligonucleotides provided in Table S7). Sequencing of cloned  
393 PCR products from both wild-type and *pyccr4-1*<sup>-</sup> samples revealed the consistent composition  
394 of the 5' and 3'UTRs, as well as the presence of a poly(A) tail of the *p28* transcript (S8 Figure).  
395 However, none of these sequencing runs could resolve the precise length of the poly(A) tail, but

396 did permit design of primers near to the poly(A) tail to assess the distribution of poly(A) tail  
397 lengths in the population. Using these primers, we did not observe any differences in poly(A)  
398 length between the wild-type and *pyccr4-1* populations (Figure 5C). These data indicate that  
399 the direct effect of PyCCR4-1 on these transcripts in gametocytes do not impact the poly(A)  
400 tail/UTR length suggesting that the complex is acting in other ways to preserve these  
401 transcripts.

402

## 403 **DISCUSSION**

404 *Plasmodium* encodes few known specific transcription factors and a relatively over-represented  
405 number of RNA-binding proteins (10% of its predicted proteome) (27, 48). One model suggests  
406 that it has adapted these complementary regulatory mechanisms to achieve its preferred RNA  
407 homeostasis. Moreover, the malaria parasite also proactively transcribes a large number of  
408 genes before transmission, whose proteins are only required post-transmission. This  
409 translational repressive mechanism has been shown to be imposed by members of the  
410 DOZI/CITH/ALBA complex, as well as by PUF2. Here, we demonstrate that the PyCCR4-1 and  
411 PyCAF1 members of the CAF1/CCR4/NOT complex play additional roles in either the  
412 preservation or expression of translationally repressed transcripts through direct and indirect  
413 means (Figure 6). Moreover, we find that PyCCR4-1 is also important for the development of  
414 the male gametocyte, as well as for the efficient transmission of gametocytes to the mosquito  
415 vector.

416 The composition and behaviors of the CAF1/CCR4/NOT complex are well-conserved in  
417 eukaryotes, but key species-specific differences exist. First, our proteomic and bioinformatic  
418 analyses of *Plasmodium* species showed that many of the core components of this complex are  
419 shared between *Drosophila melanogaster*, *Saccharomyces cerevisiae*, and *Homo sapiens* (NOT1,  
420 NOT2, NOT5 (NOT3), NOT4, CCR4, CAF1 (POP2), and CAF40), but that some proteins are  
421 apparently not encoded at all (CNOT10) (27). Second, while there are well-defined roles for this  
422 complex in both the nucleus and cytoplasm of model eukaryotes, we find by IFA that the vast  
423 majority of PyCCR4-1, PyCAF1, and by inference the entire complex, localizes to discrete  
424 cytosolic granules throughout most of the *Plasmodium* life cycle. For this reason, we have  
425 focused our analyses here upon the known cytoplasmic roles of the complex, but additional  
426 work to define possible nuclear functions of the CAF1/CCR4/NOT complex is certainly  
427 warranted. Third, in model eukaryotes CAF1 acts as a bridge to recruit CCR4 to the NOT1  
428 scaffold. Interestingly, the CAF1 domain is typically required for the association of CAF1 with  
429 the NOT complex, which although it is the essential domain of the protein, is not sufficient for  
430 robust binding to its complex. Moreover, in *Plasmodium* the CAF1 domain alone does not  
431 permit recruitment of PyCCR4-1 to PyCAF1, indicating that sequences C-terminal of this domain  
432 in *Plasmodium* help mediate these interactions. In trypanosomes, the interaction of CAF1 with  
433 the rest of the NOT complex is affected by CNOT10, which is not bioinformatically identifiable in  
434 *Plasmodium* and thus may also explain why PyCAF1 $\Delta$ C fails to properly assemble with its  
435 complex (42). This C-terminal truncation of CAF1 may result in the removal of the binding site  
436 of a yet-to-be-identified protein that fulfills this role. Finally, this exacerbated phenotype of the

437 PyCAF1 $\Delta$ C parasite line matches what has been previously seen in CAF1 mutants in yeast,  
438 perhaps due to its more central, coordinating position in the complex (49).

439 Previous studies of CCR4 in model eukaryotes have demonstrated that CCR4 can act as a  
440 translational repressor, and that its catalytic residues and deadenylase activity are implicated in  
441 its repressive functions (28, 50, 51). Our results demonstrate that PyCCR4-1 helps to preserve  
442 translationally repressed transcripts and is suggestive of similar roles in *Plasmodium* (Figure 4).  
443 Furthermore, transgenic parasites that lack *pyccr4-1*, that express a putatively dead catalytic  
444 variant of PyCCR4-1, or that express a truncated variant of PyCAF1 (PyCAF1 $\Delta$ C) demonstrate the  
445 same phenotype, and thus we conclude that the catalytic residues of the PyCCR4-1 protein and  
446 its association with its complex are required for this regulatory function (Figure 2, 6).

447 Additionally, as the maturation of male gametocytes is substantially promoted by the presence  
448 of catalytically active PyCCR4-1, it is unsurprising that one third of the transcripts that PyCCR4-1  
449 affects encode proteins that are present in a *P. berghei* male gamete proteome (Figure 4). It  
450 should be noted that the PyCCR4-1 catalytic mutant (dCCR4-1) has a slightly stronger effect  
451 upon gametocytogenesis, gametogenesis, and parasite transmission than does the deletion of  
452 *pyccr4-1*. This effect could result if dCCR4-1 is still able to bind transcripts and prevent other  
453 proteins from assembling onto them, thus acting as a dominant negative variant.

454 Similarly, expression of a truncated CAF1 variant in *P. yoelii* or *P. falciparum* produced similar  
455 phenotypes during gametocytogenesis and male gametocyte activation (Figures 2 and 3).  
456 Proteomic and IFA analyses of PyCAF1 $\Delta$ C showed that this could be explained in part because  
457 this variant no longer associated with PyCCR4-1, only weakly bound with the majority of the  
458 CAF1/CCR4/NOT complex, and became diffusely localized (Table 1, Figure S6). This work also



459 defines the CAF1 domain as the essential portion of the PfCAF1 and PyCAF1 proteins, and that  
460 sequences C-terminal of it play roles in association with NOT1 and CCR4-1 and contribute to  
461 asexual parasite growth.

462 During sexual development we find that PyCCR4-1 binds to multiple transcripts essential for  
463 gametocyte development and host-to-vector transmission, which are dysregulated in *pyccr4-1*,  
464 parasites. We hypothesize that PyCCR4-1 is interacting with and acting upon these transcripts in  
465 a concerted effort to preserve them for use post-transmission. Circular RT-PCR demonstrated  
466 that UTR and poly(A) lengths of an affected female transcript (*p28*) is not affected in *pyccr4-1*  
467 transgenic parasites. Therefore, we posit that PyCCR4-1 and its complex can be utilizing  
468 functions independent of deadenylation to achieve these ends. For instance, tethering of  
469 transcripts to the CAF1/CCR4/NOT complex is able to induce repression of a target transcript in  
470 other systems, even in the absence of deadenylation of those transcripts (28, 52). Taken  
471 together, these data indicate that the *Plasmodium* CAF1/CCR4/NOT complex provides key  
472 functions in the regulation of specific transcripts to promote coordinated male gametocyte  
473 maturation and parasite transmission.

474

## 475 **MATERIALS AND METHODS**

476 Extended versions of materials and methods are provided in S1 File.

### 477 Ethics Statement

478 All animal care strictly followed the Association for Assessment and Accreditation of Laboratory Animal  
479 Care (AAALAC) guidelines and was approved by the Pennsylvania State University Institutional Animal  
480 Care and Use Committee (IACUC# 42678-01). All procedures involving vertebrate animals were  
481 conducted in strict accordance with the recommendations in the Guide for Care and Use of Laboratory  
482 Animals of the National Institutes of Health with approved Office for Laboratory Animal Welfare (OLAW)  
483 assurance.

484

### 485 Experimental Animals

486 Six-to-eight week old female Swiss Webster mice from Harlan (recently acquired by Envigo)  
487 were used for all of the experiments in this work. *Anopheles stephensi* mosquitoes (obtained  
488 from the Center for Infectious Disease Research; Seattle, WA) were reared at 24C and 70%  
489 humidity and were used to cycle *Plasmodium yoelii* (17XNL strain) parasites.

490

### 491 Production of Transgenic Parasite Lines

492 Transgenic *Plasmodium yoelii* (17XNL strain) parasites were created using targeting sequences  
493 to incorporate sequence into the target gene using double homologous recombination using  
494 standard procedures (53). Parasite genomic DNA was purified (QIAamp DNA Blood Kit, Qiagen,

495 Cat# 51106) and genotyping PCR was performed to assess the ratio of WT to transgenic  
496 parasites present. Clonal parasite populations were produced using limiting dilution cloning.  
497 The PfCAF1ΔC line was previously generated as described (24). Validation of CAF1 transcript  
498 expression was performed via RT-PCR on 100ng DNase-treated RNA from PfCAF1ΔC and NF54-  
499 control parasites using primer sets supplied in S7 Table.

500

#### 501 Production and Accudenz Purification of *P. yoelii* Schizonts and Gametocytes

502 To produce schizonts in culture, infected Swiss Webster mice were exsanguinated by cardiac  
503 puncture and the blood was collected into complete RPMI (cRPMI), spun at 200 *xg* for 8 min to  
504 remove the serum, and then cultured in 30 ml cRPMI in a 5% CO<sub>2</sub>, 10% O<sub>2</sub>, 85% N gas mixture for  
505 12 hours at 37C. Cultures were underlaid with 10 ml of 17% w/v Accudenz in 5 mM Tris-HCl  
506 (pH 7.5@RT), 3 mM KCl, 0.3mM disodium EDTA, 0.4x PBS (without calcium and magnesium)  
507 and spun at 200 *xg* for 20 min with no brake (53). Parasites were collected from the interface  
508 between the Accudenz and cRPMI layers, transferred to a fresh conical tube, supplemented  
509 with an equal volume of additional cRPMI, and spun for 10 min at 200 *xg*. The supernatant was  
510 then removed and the parasite pellet processed for downstream applications.

511 Gametocytes were produced by treatment of the mice at 1% parasitemia with 10 mg/L  
512 sulfadiazine (VWR, Cat# AAA12370-30) in their drinking water for two days prior to  
513 exsanguination. The blood was maintained in warm (37C) cRPMI to prevent activation of  
514 gametocytes and parasites were purified as described above.

515

516 *P. falciparum* Gametocyte Production

517 Gametocyte-producing cultures were established as described previously (54) with some  
518 modification. Briefly, starter cultures of wild-type *P. falciparum* NF54 and PfCAF1ΔC were  
519 grown to ~5% parasitemia in standard culture conditions in cRPMI supplemented with 25 mM  
520 HEPES, 0.2% D-glucose, 200 uM hypoxanthine, 0.2% w/v sodium bicarbonate, and 10% v/v  
521 heat-inactivated human serum at 6% hematocrit in a tri-gas incubator (5% CO<sub>2</sub>, 5% O<sub>2</sub>) at 37C .  
522 On Day 0, starter cultures were then used to inoculate 75 cm<sup>2</sup> flasks (15ml culture volume at 6%  
523 hematocrit) in technical duplicate for each line at 0.5% parasitemia. Parasites were cultured for  
524 17 days with daily media changes and no fresh addition of blood. Samples were taken to  
525 monitor parasite development starting at Day 3 post-infection and then every 48 hours until  
526 Day 13 post-infection, determined through Giemsa-stained smears. At seven days post-  
527 infection, technical replicate flasks were combined into one flask, which was maintained for the  
528 duration of the experiment. Samples were assessed in biological triplicate.

529

530 PyDD Recombinant Protein Expression and Purification

531 Coding sequence for a domain of PyDD (PY17X\_0418900, “PyDDD” = AA1845-2334) was  
532 generated by IDT as a codon-optimized gene block (gBlock) for expression from a modified  
533 pET28b+ vector (pSL0220) in *E. coli* BL21 (DE3) pLysS CodonPlus bacteria. Protein was purified  
534 first by standard Ni-NTA and then glutathione resin approaches (details provided in S1 File).  
535 Purity was confirmed to be >90% by SDS-PAGE by Coomassie Blue staining. Antibodies were  
536 generated in rabbits (screened for pre-immune sera with minimal background reactivity) by  
537 Pocono Rabbit Farm and Laboratory (Canadensis, PA).

538

539 Live Fluorescence and IFA Microscopy

540 PyCCR4-1 and PyCAF1 expression in blood stages, oocyst sporozoites, salivary gland sporozoites  
541 and liver stages was observed by an indirect immunofluorescence assay (IFA), and expression in  
542 day seven oocysts was observed by live fluorescence. All samples for IFA were prepared as  
543 previously described, with all details provided in S1 File (55). Fluorescence and DIC images were  
544 taken using a Zeiss fluorescence/phase contrast microscope (Zeiss Axioscope A1 with 8-bit  
545 AxioCam ICc1 camera) using a 40X or 100X oil objective and processed by Zen imaging software.

546

547 Measurement of Blood Stage Growth Kinetics

548 Cryopreserved blood infected with either wild-type (Py17XNL), *pyccr4-1*, dCCR4-1, or PyCAF1ΔC  
549 parasites were injected intraperitoneally into Swiss Webster starter mice and parasitemia was  
550 allowed to increase to 1%. This blood was extracted via cardiac puncture and diluted in RPMI to  
551 10,000 parasites per 100 ul (CCR4-1, CAF1ΔC) or 1,000 parasites per 100ul microliter (dCCR4-1).  
552 One hundred microliters was injected intravenously (IV) into three mice per replicate for each  
553 parasite line. Three biological replicates were conducted, each with three technical replicates.  
554 Parasitemia was measured daily by giemsa-stained thin blood smears. Centers of  
555 movement/exflagellation centers were also measured daily via wet mount of the blood  
556 incubated at room temperature for 10 min by counting the number of exflagellating male  
557 gametocytes in a confluent monolayer per 400x field (40x objective x 10x eyepiece).

558 *P. falciparum* ring stage parasitemia and total gametocytemia were calculated every two days  
559 starting on Day 3 post-infection by averaging counts in 10,000 RBCs across a minimum of two  
560 biological replicates (provided in S6 Table). Sexual conversion was calculated as described  
561 previously (56) by taking the stage II-gametocytemia on Day T and dividing by ring stage  
562 parasitemia on Day T-2. Samples were taken for exflagellation assays on days 13, 14, 15, and 16  
563 post-infection. Two-hundred microliter samples were taken from each flask and spun down at  
564 0.3 *xg* for 30 seconds. Supernatant was removed and a 20 ul aliquot of remaining blood pellet  
565 was mixed with 20 ul of heat-inactivated human serum previously warmed to 37°C. The mixture  
566 was then allowed to incubate at room temperature for 15 min, after which exflagellation events  
567 were counted under 40x magnification for 10 fields-of-view.

568

#### 569 Flow Cytometry Gametocyte Counts

570 Cryopreserved blood infected with either wild- type (Py17XNL), *ccr4-1*, dCCR4-1, or CAF1ΔC  
571 parasites was injected intraperitoneally into starter mice and transferred as above (10,000  
572 parasites/100ul). On Day 5, gametocytes were produced by treatment of the mice with 10 mg/L  
573 sulfadiazine (VWR, Cat# AAA12370-30) in their drinking water for two days. Blood was collected  
574 by cardiac puncture and maintained in warm cRPMI to prevent activation of gametocytes and  
575 spun at 37°C. Blood was then fixed, passed through a cellulose column and stained as described  
576 above for IFA. Parasites were stained with the following primary antibodies: mouse anti-PvBIP  
577 Clone 7C6B4 (1:1000; (57)) and rabbit anti-PyDynein Heavy Chain Delta Domain (“PyDDD”,  
578 PY17X\_0418900 AA: 1845 to 2335)) (1:1000, Pocono Rabbit Farm & Laboratory, Custom PAb),

579 along with goat anti-mouse conjugated to AF594 (Fisher Scientific, A11012) and goat anti-rabbit  
580 conjugated to AF647 (Fisher Scientific, PIA32733) secondary antibodies. These were then  
581 analyzed on a LSR Fortessa (BD) in tube mode and collected samples were analyzed in FlowJo.

582

### 583 Mosquito Transmission Studies

584 Cryopreserved blood infected with either wild-type (Py17XNL), *ccr4-1*, dCCR4-1, or CAF1ΔC  
585 parasites was injected intraperitoneally into starter mice and transferred as above. Centers of  
586 movement were checked daily as above and mice were fed to mosquitoes on the peak day of  
587 exflagellation (day 5). Mosquito midguts were dissected at D7 post feed and analyzed for the  
588 prevalence of infection and oocyst numbers by microscopy. Mosquito midguts (day 10) or  
589 salivary glands (day 14) were dissected, ground, and sporozoite numbers counted.

590

### 591 Immunoprecipitations, Western Blotting, and Mass Spectrometric Proteomics

592 Parasite pellets (schizonts) were crosslinked in 1% v/v formaldehyde and lysed using RIPA lysis  
593 buffer with a 1x protease inhibitor cocktail and 0.5% v/v SUPERase In, dounce homogenization  
594 with a tight pestle, and sonication. The parasite lysate was then precleared using streptavidin-  
595 coated dynabeads was immunoprecipitated using a biotin-conjugated anti-GFP antibody loaded  
596 on streptavidin-coated dynabeads for three hours at 4C with rotation. The beads were washed  
597 with modified RIPA wash buffer (50 mM Tris-HCl (pH 8.0@RT), 1 mM EDTA, 150 mM NaCl, 1%  
598 v/v NP40) once and then transferred to a new tube. The beads were washed 3 more times with

599 modified RIPA wash buffer and then eluted at 45C overnight in a heat block. Samples were  
600 quality controlled by western blotting, and then subjected to tryptic digest and LC/MS/MS  
601 identification (Harvard Proteomics Core, run parameters listed in S1 File). The data was  
602 processed using the Trans-Proteomic Pipeline (TPP) (58) as described previously with few  
603 modifications (17). Spectra were searched against reference sequences downloaded in  
604 February 2016 from *Plasmodium yoelii* 17X (PlasmoDB, v27), mouse (Uniprot), and common  
605 contaminants (Common repository of adventitious protein sequences, (59) and randomized  
606 decoys generated through TPP. iX!Tandem and Comet searches were combined in iProphet (60)  
607 and protein identifications were determined by Peptide Prophet. Only proteins with a highly  
608 stringent false positive error rate of less than 1% are reported. To combine replicate proteomics  
609 datasets, SAINT version 2.5.0 was used (61). Only proteins with SAINT scores below 0.1 (most  
610 stringent) or 0.35 (stringent) were considered significant hits and included in the analyses, as  
611 used previously (2, 4, 6). The total proteome of Py17XNL mixed blood stages was determined  
612 using the same workflow (Penn State Proteomics Core).

613

#### 614 Total and Comparative RNA-seq

615 Gametocytes were produced, collected, and purified by an Accudenz gradient, as above.  
616 Infected RBCs were lysed with saponin, washed with 1xPBS, and released parasites were then  
617 lysed immediately using the QIAGEN RNeasy Kit using the manufacturer's protocol with the  
618 additional on-column DNaseI digestion. RNA yields were quantified spectrophotometrically by  
619 NanoDrop, and RNA samples were further quality controlled (BioAnalyzer) and used to create



620 barcoded libraries (Illumina TruSeq Stranded mRNA Library). An equimolar pool of all samples  
621 was made and 100 nt single end read sequencing was performed on an Illumina HiSeq 2500 in  
622 Rapid Run mode. The resulting data was mapped to the *P. yoelii* 17XNL strain reference genome  
623 (plasmodb.org, v32 using Tophat2 in a local Galaxy instance (version .9). Gene and transcript  
624 expression profiles for both WT-GFP and *ccr4-1*<sup>-</sup> assemblies were generated using htseq-count  
625 (Galaxy version 0.6.1galaxy3) (62) using the union mode for read overlaps. Count files were  
626 merged and compared using DESeq2 (Galaxy version 2.11.39 (63)). Six biological replicates were  
627 used for the WT transcriptomic profile, while four replicates were used in for the *ccr4-1*<sup>-</sup>  
628 profiles. These were analyzed by a mean fit type with outlier replacement turned on to  
629 normalize the variance between the count files. The P-adjusted value was used for all analyses.

630

### 631 Circular Reverse Transcription PCR (cRT-PCR)

632 RNA was isolated from purified *P. yoelii* wild type or *pyccr4-1*<sup>-</sup> gametocytes by  
633 TRIzol/chloroform extraction and extensive DNaseI digestion. The 7-methylguanosine cap was  
634 removed from 10ug of total RNA using 2.5U Cap-Clip Acid Pyrophosphatase in 1xCap-Clip Buffer  
635 supplemented with 10U Murine RNase Inhibitor at 37C for 1 hour. Treated RNA was TRIzol  
636 extracted, precipitated, dried, and then circularized with T4 RNA Ligase in T4 DNA Ligase buffer  
637 supplemented with 10% w/v PEG8000 and 10U Murine RNase Inhibitor at 16C for 24 hours.  
638 RNA was purified, precipitated, dried, and then subjected to reverse transcription using  
639 SuperScript IV and gene-specific primers (S7 Table). Specific PCR amplification of *gapdh* and *p28*

640 sequences from the resulting cDNA was conducted using Phusion polymerase (NEB) and gene  
641 specific primers (Supp Table 7).

642

#### 643 Statistical Analyses

644 Statistical differences between *P. yoelii* wild-type and transgenic parasites were assessed via a  
645 two-tailed t-test on Graphpad Prism. Statistical differences between *P. falciparum* wild-type  
646 and PfCAF1ΔC parasites were assessed via a paired Wilcoxon test using R v. 3.3.1 (64) with  $p <$   
647 0.05 indicating statistical significance.

648

#### 649 Data Availability Statement

650 All data is publically available on common data repositories. Proteomics data is accessible at the  
651 ProteomeXchange Consortium via the PRIDE partner repository with the dataset identifier  
652 PXD007042 (65). Transcriptomics data (both RAW and processed files) is accessible at the GEO  
653 repository (Accession # GSE101484). Details of datasets and identifiers are available in S1 File.

654

#### 655 **ACKNOWLEDGEMENTS**

656 We thank the Penn State University and Harvard University mass spectrometry cores for  
657 proteomic analyses, the Penn State University genomics core for RNA-sequencing, and Penn  
658 State Animal Resources for care of our animals. We thank Joe Reese for the anti-DDX6 antibody  
659 and Istvan Albert for critical discussion of transcriptomics analysis methods. We thank the

660 Lindner and Llinás labs for critical discussion of the manuscript and its data. We thank Manuel  
661 Llinas for discussion and critical review of the manuscript. We thank Alison Roth and Shulin Xu  
662 for discussion of *P. falciparum* gametocyte culturing methods. We thank Hannah Haines for  
663 help counting slides.

664

## 665 REFERENCES

- 666 1. World Malaria Report: World Health Organization.; 2017. Available from:  
667 [http://apps.who.int/iris/bitstream/handle/10665/259492/9789241565523-](http://apps.who.int/iris/bitstream/handle/10665/259492/9789241565523-eng.pdf;jsessionid=70DDB5D8052E7F941829E6BAEC189ED0?sequence=1)  
668 [eng.pdf;jsessionid=70DDB5D8052E7F941829E6BAEC189ED0?sequence=1](http://apps.who.int/iris/bitstream/handle/10665/259492/9789241565523-eng.pdf;jsessionid=70DDB5D8052E7F941829E6BAEC189ED0?sequence=1).
- 669 2. Smith RC, Vega-Rodriguez J, Jacobs-Lorena M. The Plasmodium bottleneck: malaria parasite  
670 losses in the mosquito vector. Mem Inst Oswaldo Cruz. 2014;109(5):644-61.
- 671 3. Rosenberg R, Wirtz RA, Schneider I, Burge R. An estimation of the number of malaria sporozoites  
672 ejected by a feeding mosquito. Trans R Soc Trop Med Hyg. 1990;84(2):209-12.
- 673 4. Munoz EE, Hart KJ, Walker MP, Kennedy MF, Shipley MM, Lindner SE. ALBA4 modulates its  
674 stage-specific interactions and specific mRNA fates during Plasmodium yoelii growth and transmission.  
675 Mol Microbiol. 2017.
- 676 5. Cui L, Lindner S, Miao J. Translational regulation during stage transitions in malaria parasites.  
677 Ann N Y Acad Sci. 2015;1342:1-9.
- 678 6. Lindner SE, Mikolajczak SA, Vaughan AM, Moon W, Joyce BR, Sullivan WJ, Jr., et al. Perturbations  
679 of Plasmodium Puf2 expression and RNA-seq of Puf2-deficient sporozoites reveal a critical role in  
680 maintaining RNA homeostasis and parasite transmissibility. Cellular microbiology. 2013;15(7):1266-83.
- 681 7. Muller K, Matuschewski K, Silvie O. The Puf-family RNA-binding protein Puf2 controls sporozoite  
682 conversion to liver stages in the malaria parasite. PLoS One. 2011;6(5):e19860.
- 683 8. Gomes-Santos CS, Braks J, Prudencio M, Carret C, Gomes AR, Pain A, et al. Transition of  
684 Plasmodium sporozoites into liver stage-like forms is regulated by the RNA binding protein Pumilio. PLoS  
685 Pathog. 2011;7(5):e1002046.
- 686 9. Painter HJ, Campbell TL, Llinas M. The Apicomplexan AP2 family: integral factors regulating  
687 Plasmodium development. Mol Biochem Parasitol. 2011;176(1):1-7.
- 688 10. Painter HJ, Carrasquilla M, Llinas M. Capturing in vivo RNA transcriptional dynamics from the  
689 malaria parasite Plasmodium falciparum. Genome Res. 2017;27(6):1074-86.
- 690 11. Guerreiro A, Deligianni E, Santos JM, Silva PA, Louis C, Pain A, et al. Genome-wide RIP-Chip  
691 analysis of translational repressor-bound mRNAs in the Plasmodium gametocyte. Genome Biol.  
692 2014;15(11):493.
- 693 12. Heather J Painter NCC, Aswathy Sebastian, Istvan Albert, John D Storey, Manuel Llinás. Real-time  
694 in vivo Global Transcriptional Dynamics During Plasmodium falciparum Blood-stage Development  
695 bioRxiv2018 [Available from: <https://www.biorxiv.org/content/early/2018/02/14/265975>].
- 696 13. Mair GR, Braks JA, Garver LS, Wiegant JC, Hall N, Dirks RW, et al. Regulation of sexual  
697 development of Plasmodium by translational repression. Science. 2006;313(5787):667-9.

- 698 14. Mair GR, Lasonder E, Garver LS, Franke-Fayard BM, Carret CK, Wiegant JC, et al. Universal  
699 features of post-transcriptional gene regulation are critical for Plasmodium zygote development. *PLoS*  
700 *Pathog.* 2010;6(2):e1000767.
- 701 15. Paton MG, Barker GC, Matsuoka H, Ramesar J, Janse CJ, Waters AP, et al. Structure and  
702 expression of a post-transcriptionally regulated malaria gene encoding a surface protein from the sexual  
703 stages of *Plasmodium berghei*. *Mol Biochem Parasitol.* 1993;59(2):263-75.
- 704 16. Parker R, Sheth U. P bodies and the control of mRNA translation and degradation. *Mol Cell.*  
705 2007;25(5):635-46.
- 706 17. Lindner SE, Swearingen KE, Harupa A, Vaughan AM, Sinnis P, Moritz RL, et al. Total and putative  
707 surface proteomics of malaria parasite salivary gland sporozoites. *Molecular & cellular proteomics :*  
708 *MCP.* 2013;12(5):1127-43.
- 709 18. Balagopal V, Parker R. Polysomes, P bodies and stress granules: states and fates of eukaryotic  
710 mRNAs. *Curr Opin Cell Biol.* 2009;21(3):403-8.
- 711 19. Collart MA. The Ccr4-Not complex is a key regulator of eukaryotic gene expression. *Wiley*  
712 *Interdiscip Rev RNA.* 2016;7(4):438-54.
- 713 20. Miller JE, Reese JC. Ccr4-Not complex: the control freak of eukaryotic cells. *Crit Rev Biochem*  
714 *Mol Biol.* 2012;47(4):315-33.
- 715 21. Niinuma S, Fukaya T, Tomari Y. CCR4 and CAF1 deadenylases have an intrinsic activity to remove  
716 the post-poly(A) sequence. *RNA.* 2016;22(10):1550-9.
- 717 22. Collart MA, Panasencko OO. The Ccr4--not complex. *Gene.* 2012;492(1):42-53.
- 718 23. Ukleja M, Cuellar J, Siwaszek A, Kasprzak JM, Czarnocki-Cieciura M, Bujnicki JM, et al. The  
719 architecture of the *Schizosaccharomyces pombe* CCR4-NOT complex. *Nature communications.*  
720 2016;7:10433.
- 721 24. Balu B, Maher SP, Pance A, Chauhan C, Naumov AV, Andrews RM, et al. CCR4-associated factor 1  
722 coordinates the expression of *Plasmodium falciparum* egress and invasion proteins. *Eukaryotic cell.*  
723 2011;10(9):1257-63.
- 724 25. Balu B, Singh N, Maher SP, Adams JH. A genetic screen for attenuated growth identifies genes  
725 crucial for intraerythrocytic development of *Plasmodium falciparum*. *PLoS One.* 2010;5(10):e13282.
- 726 26. Bushell E, Gomes AR, Sanderson T, Anar B, Girling G, Herd C, et al. Functional Profiling of a  
727 *Plasmodium* Genome Reveals an Abundance of Essential Genes. *Cell.* 2017;170(2):260-72 e8.
- 728 27. Reddy BP, Shrestha S, Hart KJ, Liang X, Kemirembe K, Cui L, et al. A bioinformatic survey of RNA-  
729 binding proteins in *Plasmodium*. *BMC Genomics.* 2015;16(1):890.
- 730 28. Cooke A, Prigge A, Wickens M. Translational repression by deadenylases. *J Biol Chem.*  
731 2010;285(37):28506-13.
- 732 29. Guntur AR, Kawai M, Le P, Boussein ML, Bornstein S, Green CB, et al. An essential role for the  
733 circadian-regulated gene nocturnin in osteogenesis: the importance of local timekeeping in skeletal  
734 homeostasis. *Ann N Y Acad Sci.* 2011;1237:58-63.
- 735 30. Temme C, Zhang L, Kremmer E, Ihling C, Chartier A, Sinz A, et al. Subunits of the *Drosophila*  
736 CCR4-NOT complex and their roles in mRNA deadenylation. *RNA.* 2010;16(7):1356-70.
- 737 31. Jain S, Wheeler JR, Walters RW, Agrawal A, Barsic A, Parker R. ATPase-Modulated Stress  
738 Granules Contain a Diverse Proteome and Substructure. *Cell.* 2016;164(3):487-98.
- 739 32. Guo L, Kim HJ, Wang H, Monaghan J, Freyermuth F, Sung JC, et al. Nuclear-Import Receptors  
740 Reverse Aberrant Phase Transitions of RNA-Binding Proteins with Prion-like Domains. *Cell.*  
741 2018;173(3):677-92 e20.
- 742 33. Sievers F, Higgins DG. Clustal omega. *Curr Protoc Bioinformatics.* 2014;48:3 13 1-6.
- 743 34. Dupressoir A, Morel AP, Barbot W, Loireau MP, Corbo L, Heidmann T. Identification of four  
744 families of  $\gamma$ CCR4- and Mg<sup>2+</sup>-dependent endonuclease-related proteins in higher eukaryotes, and

- 745 characterization of orthologs of yCCR4 with a conserved leucine-rich repeat essential for hCAF1/hPOP2  
746 binding. *BMC Genomics*. 2001;2:9.
- 747 35. Raisch T, Bhandari D, Sabath K, Helms S, Valkov E, Weichenrieder O, et al. Distinct modes of  
748 recruitment of the CCR4-NOT complex by *Drosophila* and vertebrate Nanos. *EMBO J*. 2016;35(9):974-90.
- 749 36. Sandler H, Kreth J, Timmers HT, Stoecklin G. Not1 mediates recruitment of the deadenylase Caf1  
750 to mRNAs targeted for degradation by tristetraprolin. *Nucleic Acids Res*. 2011;39(10):4373-86.
- 751 37. Stowell JA, Webster MW, Kogel A, Wolf J, Shelley KL, Passmore LA. Reconstitution of Targeted  
752 Deadenylation by the Ccr4-Not Complex and the YTH Domain Protein Mmi1. *Cell Rep*. 2016;17(8):1978-  
753 89.
- 754 38. Schwach F, Bushell E, Gomes AR, Anar B, Girling G, Herd C, et al. PlasmoGEM, a database  
755 supporting a community resource for large-scale experimental genetics in malaria parasites. *Nucleic  
756 Acids Res*. 2015;43(Database issue):D1176-82.
- 757 39. Anders S, Huber W. Differential expression analysis for sequence count data. *Genome Biol*.  
758 2010;11(10):R106.
- 759 40. Noble WS. How does multiple testing correction work? *Nat Biotechnol*. 2009;27(12):1135-7.
- 760 41. Ikadai H, Shaw Saliba K, Kanzok SM, McLean KJ, Tanaka TQ, Cao J, et al. Transposon mutagenesis  
761 identifies genes essential for *Plasmodium falciparum* gametocytogenesis. *Proc Natl Acad Sci U S A*.  
762 2013;110(18):E1676-84.
- 763 42. Farber V, Erben E, Sharma S, Stoecklin G, Clayton C. Trypanosome CNOT10 is essential for the  
764 integrity of the NOT deadenylase complex and for degradation of many mRNAs. *Nucleic Acids Res*.  
765 2013;41(2):1211-22.
- 766 43. Yeoh LM, Goodman CD, Mollard V, McFadden GI, Ralph SA. Comparative transcriptomics of  
767 female and male gametocytes in *Plasmodium berghei* and the evolution of sex in alveolates. *BMC  
768 Genomics*. 2017;18(1):734.
- 769 44. Lasonder E, Rijpma SR, van Schaijk BC, Hoeijmakers WA, Kensche PR, Gresnigt MS, et al.  
770 Integrated transcriptomic and proteomic analyses of *P. falciparum* gametocytes: molecular insight into  
771 sex-specific processes and translational repression. *Nucleic Acids Res*. 2016;44(13):6087-101.
- 772 45. Otto TD, Bohme U, Jackson AP, Hunt M, Franke-Fayard B, Hoeijmakers WA, et al. A  
773 comprehensive evaluation of rodent malaria parasite genomes and gene expression. *BMC Biol*.  
774 2014;12:86.
- 775 46. Lopez-Barragan MJ, Lemieux J, Quinones M, Williamson KC, Molina-Cruz A, Cui K, et al.  
776 Directional gene expression and antisense transcripts in sexual and asexual stages of *Plasmodium  
777 falciparum*. *BMC Genomics*. 2011;12:587.
- 778 47. Young JA, Fivelman QL, Blair PL, de la Vega P, Le Roch KG, Zhou Y, et al. The *Plasmodium  
779 falciparum* sexual development transcriptome: a microarray analysis using ontology-based pattern  
780 identification. *Mol Biochem Parasitol*. 2005;143(1):67-79.
- 781 48. Bunnik EM, Batugedara G, Saraf A, Prudhomme J, Florens L, Le Roch KG. The mRNA-bound  
782 proteome of the human malaria parasite *Plasmodium falciparum*. *Genome Biol*. 2016;17(1):147.
- 783 49. Halter D, Collart MA, Panasenko OO. The Not4 E3 ligase and CCR4 deadenylase play distinct  
784 roles in protein quality control. *PLoS One*. 2014;9(1):e86218.
- 785 50. Duy DL, Suda Y, Irie K. Cytoplasmic deadenylase Ccr4 is required for translational repression of  
786 LRG1 mRNA in the stationary phase. *PLoS One*. 2017;12(2):e0172476.
- 787 51. Woolstencroft RN, Beilharz TH, Cook MA, Preiss T, Durocher D, Tyers M. Ccr4 contributes to  
788 tolerance of replication stress through control of CRT1 mRNA poly(A) tail length. *J Cell Sci*. 2006;119(Pt  
789 24):5178-92.
- 790 52. Eulalio A, Huntzinger E, Nishihara T, Rehwinkel J, Fauser M, Izaurralde E. Deadenylation is a  
791 widespread effect of miRNA regulation. *RNA*. 2009;15(1):21-32.

- 792 53. Methods in Malaria Research 2013. Available from:  
793 [https://www.beiresources.org/portals/2/MR4/Methods\\_In\\_Malaria\\_Research-6th\\_edition.pdf](https://www.beiresources.org/portals/2/MR4/Methods_In_Malaria_Research-6th_edition.pdf).
- 794 54. Carter R. The Culture and Preparation of Gametocytes of Plasmodium falciparum for  
795 Immunochemical, Molecular, and Mosquito Infectivity Studies. In: Hyde JE, editor. Protocols in  
796 Molecular Parasitology. Methods in Molecular Biology 1993. p. 67-88.
- 797 55. Miller JL, Harupa A, Kappe SH, Mikolajczak SA. Plasmodium yoelii macrophage migration  
798 inhibitory factor is necessary for efficient liver-stage development. Infect Immun. 2012;80(4):1399-407.
- 799 56. Reece SE, Ali E, Schneider P, Babiker HA. Stress, drugs and the evolution of reproductive  
800 restraint in malaria parasites. Proc Biol Sci. 2010;277(1697):3123-9.
- 801 57. Mikolajczak SA, Vaughan AM, Kangwanransan N, Roobsoong W, Fishbaugher M,  
802 Yimamnuaychok N, et al. Plasmodium vivax liver stage development and hypnozoite persistence in  
803 human liver-chimeric mice. Cell Host Microbe. 2015;17(4):526-35.
- 804 58. Deutsch EW, Mendoza L, Shteynberg D, Slagel J, Sun Z, Moritz RL. Trans-Proteomic Pipeline, a  
805 standardized data processing pipeline for large-scale reproducible proteomics informatics. Proteomics  
806 Clin Appl. 2015;9(7-8):745-54.
- 807 59. Mellacheruvu D, Wright Z, Couzens AL, Lambert JP, St-Denis NA, Li T, et al. The CRAPome: a  
808 contaminant repository for affinity purification-mass spectrometry data. Nat Methods. 2013;10(8):730-  
809 6.
- 810 60. Shteynberg D, Deutsch EW, Lam H, Eng JK, Sun Z, Tasman N, et al. iProphet: multi-level  
811 integrative analysis of shotgun proteomic data improves peptide and protein identification rates and  
812 error estimates. Mol Cell Proteomics. 2011;10(12):M111 007690.
- 813 61. Choi H, Larsen B, Lin ZY, Breitzkreutz A, Mellacheruvu D, Fermin D, et al. SAINT: probabilistic  
814 scoring of affinity purification-mass spectrometry data. Nat Methods. 2011;8(1):70-3.
- 815 62. Anders S, Pyl PT, Huber W. HTSeq--a Python framework to work with high-throughput  
816 sequencing data. Bioinformatics. 2015;31(2):166-9.
- 817 63. Love MI, Huber W, Anders S. Moderated estimation of fold change and dispersion for RNA-seq  
818 data with DESeq2. Genome Biol. 2014;15(12):550.
- 819 64. Team RC. R: A language and environment for statistical computing.: R Foundation for Statistical  
820 Computing, Vienna, Austria. ; 2016.
- 821 65. Vizcaino JA, Csordas A, del-Toro N, Dienes JA, Griss J, Lavidas I, et al. 2016 update of the PRIDE  
822 database and its related tools. Nucleic Acids Res. 2016;44(D1):D447-56.
- 823 66. Talman AM, Prieto JH, Marques S, Ubaida-Mohien C, Lawniczak M, Wass MN, et al. Proteomic  
824 analysis of the Plasmodium male gamete reveals the key role for glycolysis in flagellar motility. Malar J.  
825 2014;13:315.
- 826 67. Bai Y, Salvadore C, Chiang YC, Collart MA, Liu HY, Denis CL. The CCR4 and CAF1 proteins of the  
827 CCR4-NOT complex are physically and functionally separated from NOT2, NOT4, and NOT5. Mol Cell Biol.  
828 1999;19(10):6642-51.
- 829 68. Bhaskar V, Basquin J, Conti E. Architecture of the ubiquitylation module of the yeast Ccr4-Not  
830 complex. Structure. 2015;23(5):921-8.
- 831 69. Petit AP, Wohlbold L, Bawankar P, Huntzinger E, Schmidt S, Izaurralde E, et al. The structural  
832 basis for the interaction between the CAF1 nuclease and the NOT1 scaffold of the human CCR4-NOT  
833 deadenylase complex. Nucleic Acids Res. 2012;40(21):11058-72.
- 834 70. Kelley LA, Mezulis S, Yates CM, Wass MN, Sternberg MJ. The Phyre2 web portal for protein  
835 modeling, prediction and analysis. Nat Protoc. 2015;10(6):845-58.
- 836 71. States DJ, Gish W. Combined use of sequence similarity and codon bias for coding region  
837 identification. J Comput Biol. 1994;1(1):39-50.





840 **FIGURE AND TABLE LEGENDS**

841 Figure 1: PyCCR4-1::GFP is expressed in cytosolic granules in sexual stage parasites.

842 Representative images of sexual stages treated with DAPI and antibodies to GFP (to detect  
843 PyCCR4-1::GFP) or to stage-specific cellular markers (alpha-tubulin, or human DDX6 that cross-  
844 reacts with DOZI) are shown. Scale bars are 5 microns.

845 Figure 2: In *pyccr4-1*, dCCR4-1, and PyCAF1ΔC parasites, coordination of gametocyte activation  
846 is lost and male gametocyte development and parasite transmissibility is reduced. A) The  
847 number of mature male gametocytes was determined by flow cytometry of sulfadiazine-treated  
848 and DDD/BIP-stained *P. yoelii* parasites. B,C,F) The number of centers-of-  
849 movement/exflagellation centers were quantified daily by microscopy on a 400x field upon  
850 injection with 10,000 (B, F) or 1,000 (C) blood stage parasites. Fewer WT and dCCR4-1 parasites  
851 were injected to better preserve animal health over the course of the experiment in accordance  
852 with our IACUC protocol (C). Plotted are three biological replicates with three technical  
853 replicates each. Error bars represent the standard error of the mean. D) The number of oocysts  
854 per infected mosquito on day seven post-infectious blood meal are plotted. Data represents at  
855 least 20 dissected mosquitoes per biological replicate conducted in triplicate. Error bars  
856 represent the standard error of the mean. E) Parasitemia was measured microscopically by  
857 giemsa-stained thin blood smears. Plotted are three biological replicates with three technical  
858 replicates each. Error bars represent the standard error of the mean.

859 Figure 3: PfCAF1ΔC has decreased gametocyte conversion and exflagellation compared to wild  
860 type NF54 parasites. A) *P. falciparum* ring stage parasitemia and B) total gametocytemia



861 counted in 10,000 RBCs averaged over a minimum of two biological replicates. Ring stages  
862 were used to represent asexual parasitemia as they were most easily distinguishable from  
863 dead/dying asexual forms. C) Conversion rates were calculated as described previously (56) by  
864 taking the stage II-gametocytemia on Day T and dividing by ring stage parasitemia on Day T-2.  
865 D) Exflagellation events were counted under 40x magnification for 10 fields of view. Error bars  
866 represent standard error of the mean. Statistical differences between wild-type and PfCAF1ΔC  
867 parasites were assessed via a paired Wilcoxon test. \* =  $p < 0.05$ , \*\* =  $p < 0.01$ )

868 Figure 4: Transcripts with sex/transmission-related functions are modulated by PyCCR4-1. A) A  
869 volcano plot showing changes in transcript abundance up (blue), down (red) or unchanged  
870 (black). While few transcripts go up in abundance (from antigenically variant genes), nearly all  
871 affected transcripts decrease in abundance, thus indicating that PyCCR4-1 may play a role in  
872 preserving these mRNAs. B) In *pyccr4-1*<sup>-</sup> gametocytes, twenty four percent of differentially  
873 abundant transcripts are translationally repressed in female gametocytes and another one third  
874 of the transcripts are enriched in the male gamete proteome (44, 66). \* =  $p < 0.01$  by Fisher test

875 Figure 5: The CAF1/CCR4/NOT complex associates with some dysregulated transcripts but  
876 doesn't grossly affect UTR/poly(A) tail length. A) Immunoprecipitation of PyCCR4-1::GFP  
877 allowed detection of the association of three selected transcripts that are affected by *pyccr4-1*<sup>-</sup>  
878 (top), whereas other affected transcripts do not associate with PyCCR4-1::GFP (bottom, left).  
879 Two control transcripts that do not change upon deletion of *pyccr4-1* also do not interact with  
880 PyCCR4-1::GFP (bottom right). Shown are input and elution samples of a constitutive GFP-  
881 expressing clone and a PyCCR4-1::GFP clone. Amplicons and primer dimer bands are indicated  
882 with arrows. B and C) Circularized RT-PCR (cRT-PCR) of *p28* was conducted in both wild-type

883 and *pyccr4-1* parasites to detect effects by PyCCR4-1 upon UTR and poly(A) tail length in  
884 purified gametocytes. Primers were designed within the coding sequences (B) or near the  
885 poly(A) tail (C) as defined by sequencing of cRT-PCR products from panel B, which allow  
886 observations of UTR and poly(A) tail lengths respectively. Three biological replicates and a No  
887 Template Control (NTC) are shown with NEB 100bp molecular weight ladder in parallel.  
888 Extended data is available in S7 and S8 Figures.

889 Figure 6: PyCCR4-1 acts as a regulator of specific transcripts in gametocytes while CAF1 acts  
890 more generally. The CAF1/CCR4/NOT complex in *Plasmodium* as identified through crosslinking  
891 IP-MS is shown. Contacts are inferred through previous studies in model organisms and  
892 sequence conservation of the interaction domains (19, 23, 67-69).

893 Table 1: Interacting proteins with PyCCR4-1::GFP and PyCAF1ΔC::GFP proteins. Identified  
894 proteins are categorized based upon known or putative functions. Those that are currently  
895 unannotated are marked with an asterisk and described with the name of the closest protein  
896 identified by BLASTp alignment and/or a Phyre2 search (70, 71). Within each category, proteins  
897 are listed from lowest to highest SAINT score based on the PyCCR4-1::GFP data. Most stringent  
898 SAINT Score is unshaded, SAINT scores that fall between 0.1 and 0.35 are shaded in light gray  
899 and above 0.35 are shaded in dark gray. Strength of interactions in the other categories differ  
900 highly between the two immunoprecipitations. Average P is the average P value of all three  
901 biological replicates and SAINT Score is SAINT's representation of FDR. Total number of  
902 experimental and control spectra for each replicate are also shown for comparison.

## 903 SUPPLEMENTAL FIGURE AND TABLE LEGENDS

904 S1 Figure (.PDF): Genotyping PCR of (A) *pyccr4-1::gfp* Insertion of a C-terminal GFP tag was  
905 created using double homologous recombination at the 3' end of the *pyccr4-1* coding sequence.  
906 Genotyping was performed by PCR on parasites using the primers indicated (listed in S7 Table).  
907 Independent clones were analyzed with a Py17XNL wild-type control, a no template control,  
908 and a plasmid positive control in parallel. (B, C, D) PyCCR4-1::GFP is expressed in asexual and  
909 mosquito stage parasites but is not detectable in liver stage parasites. Representative images of  
910 (B) asexual blood stage parasites, (C) oocyst sporozoites, salivary gland sporozoites and (D) 24  
911 hour and 48 hour liver stage parasites treated with DAPI and antibodies to GFP (to detect  
912 PyCCR4-1::GFP) or to stage-specific cellular markers (CSP, ACP) are shown. Oocysts were  
913 imaged by live fluorescence. Scale bars are either 20 microns (oocysts), 5 microns (sporozoites),  
914 or 10 microns (asexual blood stage and liver stage parasites).

915 S2 Figure (.PDF): (A) The four bioinformatically predictable CCR4 domain-containing proteins of  
916 *Plasmodium* species. The four proteins with identified exonuclease-endonuclease-phosphatase  
917 domains (shaded white rectangles) are shown to scale with their domain architecture, introns  
918 (gaps) and exons (rectangles). Also shown are E-values for their EEP domain based upon their  
919 alignment with CCR4 (PLN03144) via the Conserved Protein Domain Database. (B) The four  
920 bioinformatically predictable CCR4 domain-containing proteins from *P. yoelii*, the catalytically  
921 dead PyCCR4-1 (dPyCCR4-1), CCR4-1 from *P. falciparum*, and examples from *S. cerevisiae*,  
922 human, and mouse were aligned using EMBL Clustal Omega. Shown is the region around the  
923 catalytic residues of CCR4. Highlighted in red font are the two catalytic residues and in black  
924 highlighting with white font are the two residues that were changed to create the catalytic

925 dead variant. (C-F) Genotyping PCR of (C) *pyccr4-1<sup>-</sup>*, (D) *pyccr4-2<sup>-</sup>*, (E) *pyccr4-3<sup>-</sup>*, and (F) *pyccr4-*  
926 *4<sup>-</sup>* transgenic parasites. Successful genetic deletions were created using double homologous  
927 recombination of the targeting sequence consisting of ~750bp on either side of the ORF.  
928 Genotyping was performed by PCR on parasites cloned by limiting dilution using the primers  
929 indicated (listed in S7 Table). Independent clones were compared to a Py17XNL wild-type  
930 control, a no template control, and a plasmid positive control in parallel.

931

932 S3 Figure (.PDF): (A) Asexual blood stage growth was monitored for two *pyccr4-1<sup>-</sup>* transgenic  
933 clonal lines compared to a WT-GFP control line over the entire course of an infection. No  
934 significant difference in growth kinetics was observed. (B) Gametocyte counts were performed  
935 using flow cytometry. Asexual stage parasites were removed with two days of sulfadiazine  
936 treatment and WBC's were removed using a cellulose column. PyDDD high and BIP + cells were  
937 scored as mature male gametocytes and DDD mid and BIP+ cells were scored as immature  
938 gametocytes and female gametocytes. No red blood cells were excluded in this analysis, and  
939 thus permitted measurement of gametocytemia. A PyDDD promoter driving GFP was used to  
940 establish gating of mature male gametocytes. PyDDD+ cells were FACS selected and observed  
941 to be male gametocytes (giemsa staining) that could undergo gametogenesis (exflagellation  
942 assay). (C) Genotyping PCR of dCCR4-1 transgenic parasites is shown. A successful replacement  
943 of the PyCCR4-1 catalytic residues were created using double homologous recombination to  
944 insert a C-terminal GFP tag and stop codon following the PyCCR4-1 stop codon. Genotyping was  
945 performed by PCR on parasites cloned by limiting dilution cloning using the primers indicated  
946 (listed in S7 Table). Independent clones were analyzed with a Py17XNL wild-type control, a no

947 template control, and a plasmid positive control in parallel. Sequencing results are shown  
948 demonstrating the appropriate base change has occurred. This mutates the putative active  
949 residues to alanines. (D) Raw gametocytemia values are plotted. Error bars are standard error  
950 of the mean. (E) A mosquito feed was performed 2 days after the peak day of exflagellation  
951 (D7). The number of oocysts per infected mosquito on day seven post-infectious blood meal are  
952 plotted. Data represents at least 20 dissected mosquitoes per biological replicate conducted in  
953 triplicate. Error bars represent the standard error of the mean.

954

955 S4 Figure (.PDF): (A) Genotyping PCR of *pycaf1* transgenic parasites. An unsuccessful attempt at  
956 gene deletion by double homologous recombination using targeting sequences consisting of  
957 ~750bp on either side of the ORF is depicted. Genotyping was performed by PCR on parasites  
958 subjected to two rounds of drug selection using the primers indicated (listed in S7 Table). These  
959 parasites were compared to a Py17XNL wild-type control, a no template control, and a plasmid  
960 positive control in parallel. (B) A *P. falciparum* line carrying a *piggyBac* transposon inserted after  
961 the CAF1 deadenylase domain makes a truncated transcript. Schematic of RT-PCR primers  
962 aligned to the CAF1 ORF. The site of the *piggyBac* disruption is indicated by dotted line. RT-PCR  
963 results indicate wild-type NF54 and PfCAF1ΔC parasites both make transcript from the  
964 deadenylase domain (primer set P1; S7 Table). PfCAF1ΔC parasites do not make a full-length  
965 transcript (primer set P2; S7 Table). (C) Genotyping PCR of *pycaf1* disruptant transgenic  
966 parasites is shown. A successful disruption of *pycaf1* was created using double homologous  
967 recombination to insert a C-terminal GFP tag and stop codon following the CAF1 domain.  
968 Genotyping was performed by PCR on parasites cloned by limiting dilution cloning using the

969 primers indicated (listed in S7 Table). Independent clones were analyzed with a Py17XNL wild-  
970 type control, a no template control, and a plasmid positive control in parallel.

971 S5 Figure (.PDF): Expression of PyCAF1 $\Delta$ C prevents its association with the CAF1/CCR4/NOT  
972 complex and its binding partners. A comparison of interactions by PyCCR4-1::GFP or  
973 PyCAF1 $\Delta$ C1::GFP in blood stage schizonts was conducted to determine effects upon the  
974 assembly of the CAF1/CCR4/Not complex. (A) Using a very stringent SAINT score cutoff (0.1),  
975 only two proteins are in common between the PyCCR4-1::GFP and PyCAF1 $\Delta$ C interactomes.  
976 Using an expanded SAINT score cutoff (0.35), relatively few interactions are still found to be in  
977 common. (B) Interaction of PyCCR4 with PyCAF1 and PyCAF1 with the NOT complex is abolished  
978 with PyCAF1 truncation (PyCAF1 $\Delta$ C). Reported are proteins that interact with PyCCR4-1::GFP or  
979 PyCAF1 $\Delta$ C::GFP using very stringent SAINT Scores (<0.1, unshaded), stringent SAINT scores (0.1  
980 to 0.35, shaded light gray) and those with SAINT scores above 0.35 (shaded dark gray).

981 S6 Figure (.PDF): (A) PyCAF1::GFP is diffusely expressed with some areas of higher intensity in  
982 asexual blood stages and in cytosolic granules in gametocytes. Representative images of  
983 asexual blood stages, and sexual stages treated with DAPI and antibodies to GFP (to detect  
984 PyCAF1::GFP) or to stage-specific cellular markers (ACP, alpha-tubulin, or human DDX6 that  
985 cross-reacts with DOZI) are shown. Scale bars are 5 microns. (B) PyCAF1 $\Delta$ C::GFP is diffusely  
986 expressed in asexual blood stages and diffusely expressed with some areas of higher intensity in  
987 gametocytes. Representative images of asexual blood stages, and sexual stages treated with  
988 DAPI and antibodies to GFP (to detect PyCAF1::GFP) or to stage-specific cellular markers (ACP,  
989 alpha-tubulin, or human DDX6 that cross-reacts with DOZI) are shown. Scale bars are 5  
990 microns.

991 S7 Figure: Extended data related to Figure 5. Control reactions lacking reverse transcriptase are  
992 provided in addition to the +RT experimental samples for all assays. Assessment of *gapdh* by  
993 cRT-PCR is also provided as a control.

994 S8 Figure: Sanger sequencing of cRT-PCR products from the circularized p28 transcript using  
995 primers that anneal within the coding sequence (upper case) permitted identification of the 5'  
996 (red font, lower case) and 3' UTRs (blue font, lower case), as well as the poly(A) tail (black font,  
997 lower case, underlined). Sequencing could not extend robustly through the poly(A) tail to  
998 provide an exact length from either forward or reverse sequencing primers (denoted by  
999 dashes). Sequences of the circularized gene product are provided from a cloned PCR product  
1000 that is representative of UTRs from both wild-type and *pyccr4-1*<sup>-</sup> samples.

1001 S1 Table (.XLSX): Measurements of transmission-related phenomena for each *pyccr4-1*<sup>-</sup> clone is  
1002 shown as averages for each replicate. Centers of movement/exflagellation centers are shown as  
1003 an average of the number of exflagellating males per field in ten 400x fields. Prevalence of  
1004 mosquito infections, oocyst counts, and sporozoite counts are all averages from at least 20  
1005 mosquitoes per replicate conducted in biological triplicate. Additional information on methods  
1006 and data listed is provided in a README tab. Male and female gametocyte counts are shown for  
1007 wild-type parasites expressing GFPmut2 from a disrupted *p230p* locus and *pyccr4-1*<sup>-</sup> transgenic  
1008 parasite lines. There is no appreciable difference in male gametocytemia between each line  
1009 that would explain the extent of the decrease of male gametocytes that can activate into  
1010 gametes on the peak day.

1011 S2 Table (.XLSX): The raw and annotated outputs from DEseq2 comparison of transcript  
1012 abundance from four biological replicates of *pyccr4-1*<sup>-</sup> parasites vs six biological replicates of  
1013 Py17XNL wild-type parasites is provided. Additional information on data listed is provided in a  
1014 README tab.

1015 S3 Table (.XLSX): Genes associated with translationally repressed transcripts in female  
1016 gametocytes (31), male gamete-enriched proteins (32), and transcripts that are affected by  
1017 deletion of *pyccr4-1* are listed. Comparisons of these lists were used to generate Venn diagrams  
1018 (Figure 2). The Input tab is the gene ID's from each input and the Output tab contains the  
1019 independent and overlapping fields of the Venn diagram in Figure 2.

1020 S4 Table (.XLSX): The total proteomes of PY17XNL wild-type parasites and *pyccr4-1*<sup>-</sup> parasites  
1021 are provided as their RAW output, FDR 1% cutoff and a list of the *Plasmodium* proteins  
1022 detected within the 1% FDR cutoff for each parasite type.

1023 S5 Table (.XLSX): Output files from TPP (The Trans-Proteomic Pipeline) are shown in individual  
1024 tables for each control and experimental replicate. The output from the SAINT IP-MS data  
1025 analysis is also shown with the PyCCR4-1::GFP bait protein manually added. Identified proteins  
1026 are sorted by SAINT Scores, with highly stringent (< 0.1) being unshaded and stringent (0.1 to  
1027 0.35) hits shaded light grey, and all proteins with SAINT scores >0.35 shaded dark gray. The  
1028 output files from TPP (The Trans-Proteomic Pipeline) are shown in individual tables for each  
1029 control and experimental replicate. The output from the SAINT IP-MS data analysis is also  
1030 shown with the PyCAF1ΔC::GFP bait protein manually added. Identified proteins are sorted by



1031 SAINT Scores, with highly stringent ( $< 0.1$ ) being unshaded and stringent (0.1 to 0.35) hits  
1032 shaded light grey, and all proteins with SAINT scores  $>0.35$  shaded dark gray.

1033 S6 Table (.XLSX): Measurements of *P. falciparum* transmission-related phenotypes. Data are  
1034 shown for each replicate. Additional information is provided in a README tab.

1035 S7 Table (.XLSX): Oligonucleotides that were used to generate and genotype transgenic  
1036 parasites are shown. Upper case letters indicate nucleotides that match perfectly with the  
1037 native genomic sequence, while lower case letters do not.

Figure 1 Hart et al.

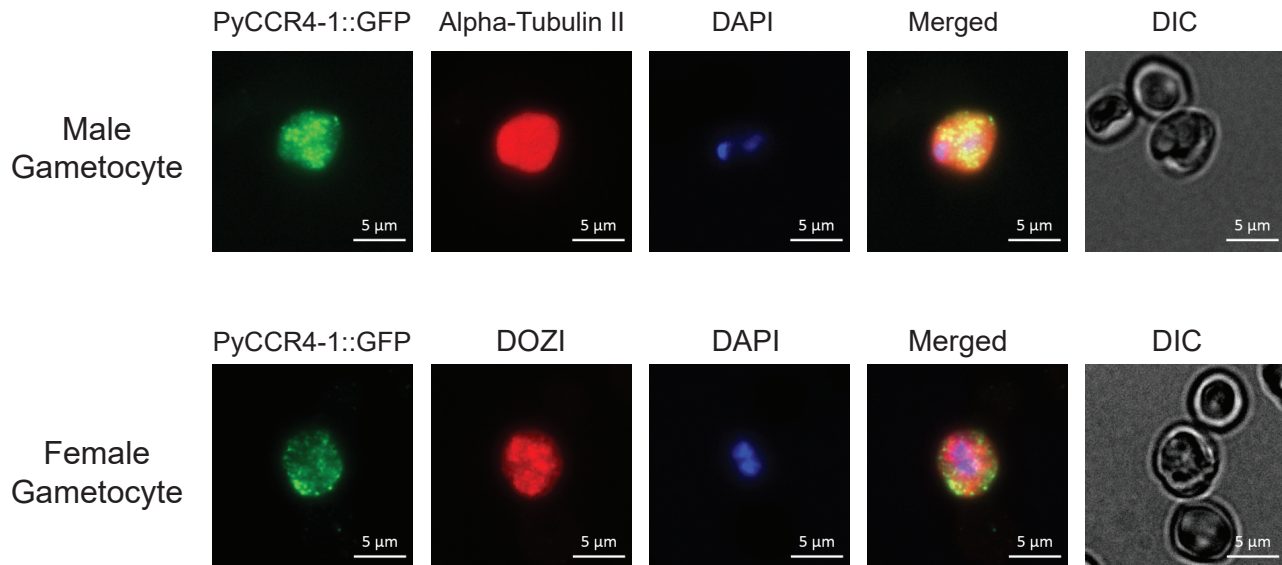

Figure 2

A.

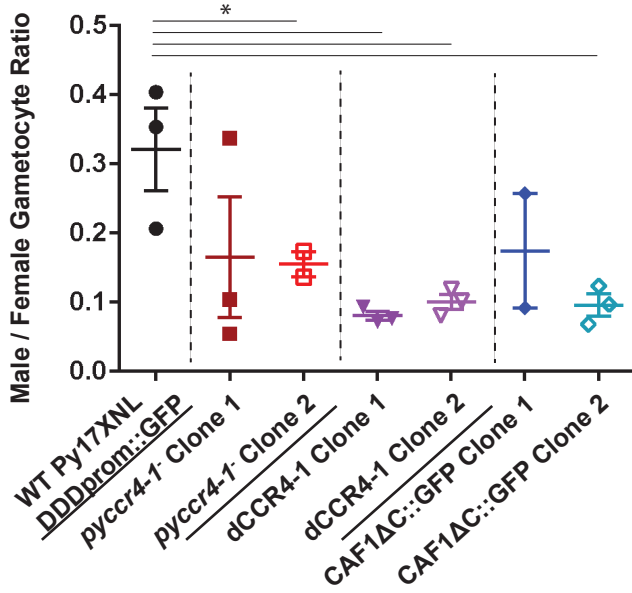

B.

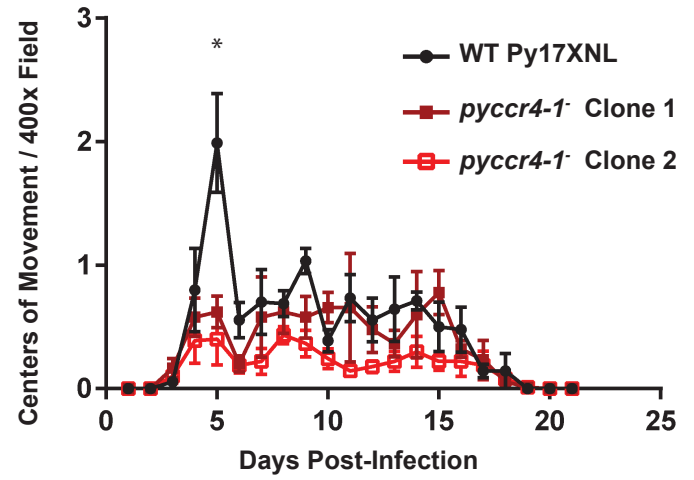

C.

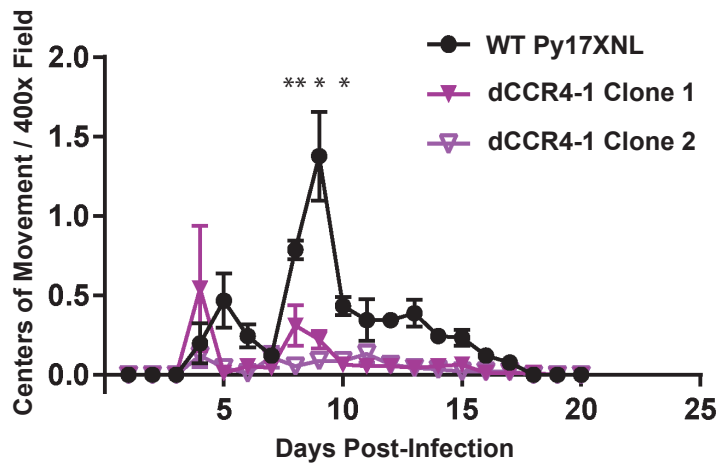

D.

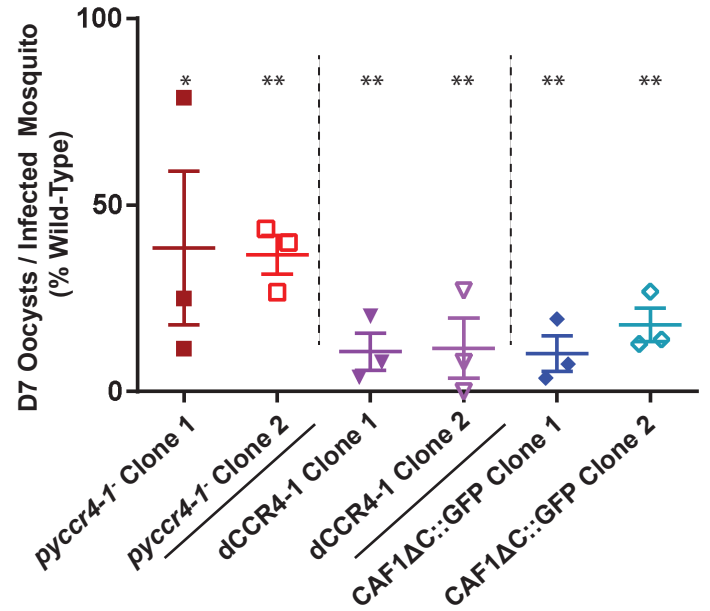

E.

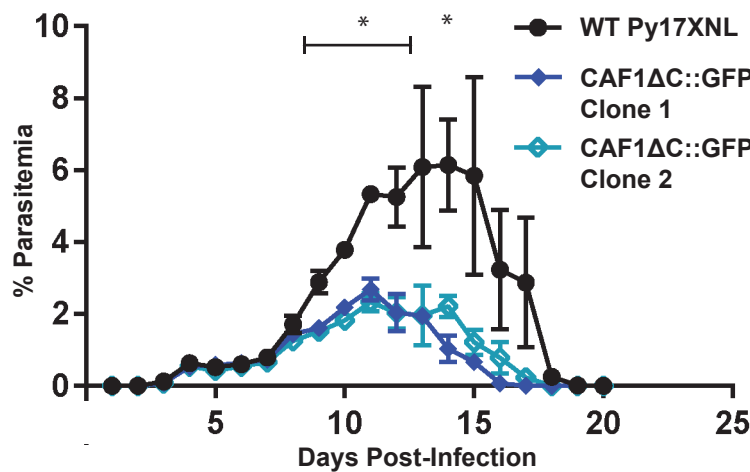

F.

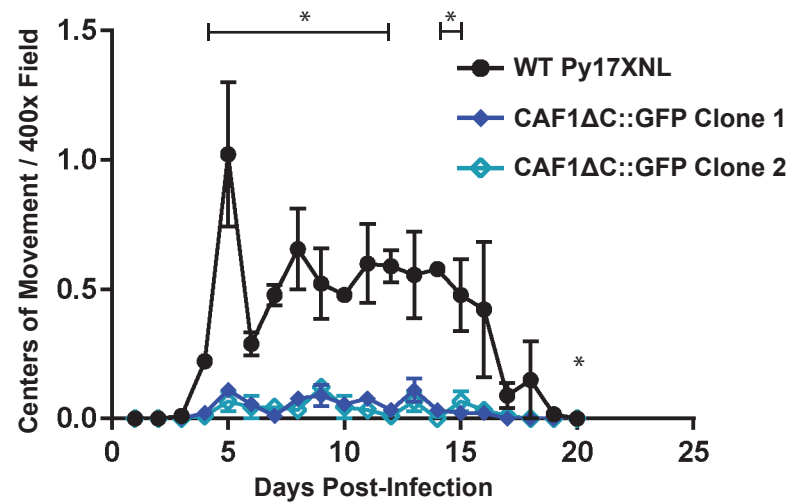

Figure 3: Hart *et al.*

A.

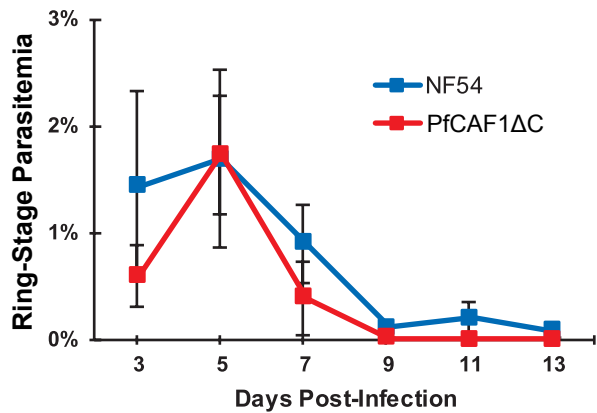

B.

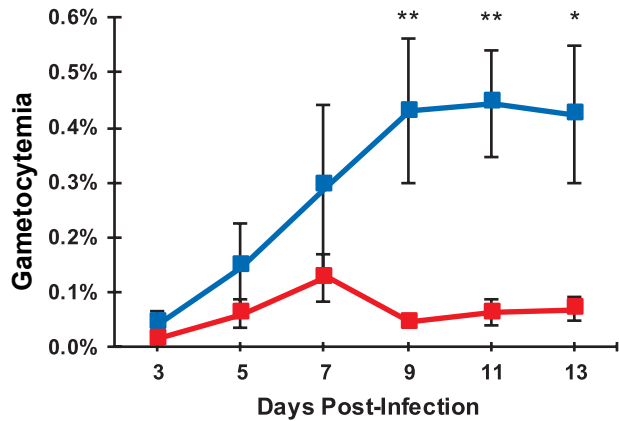

C.

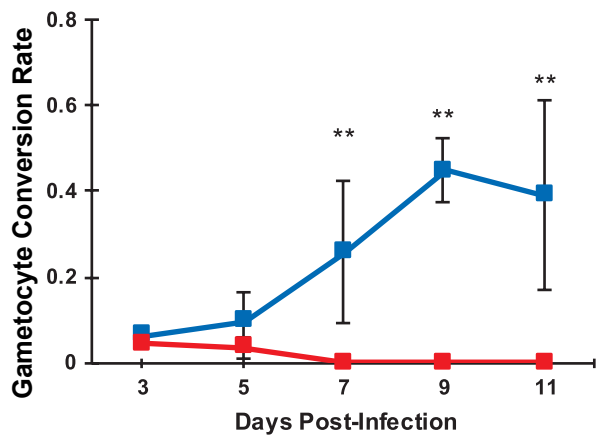

D.

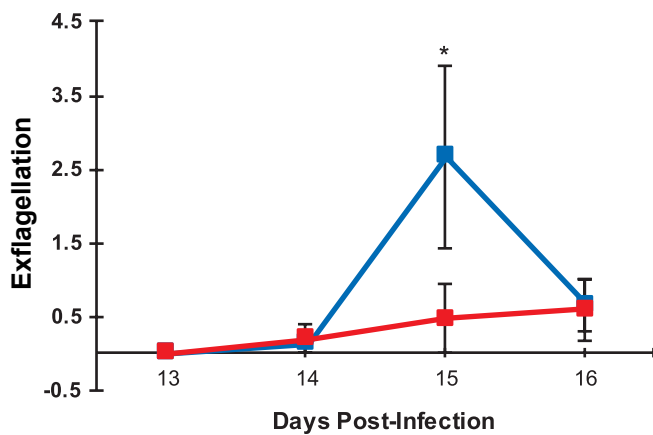

Figure 4: Hart *et al.*

A.

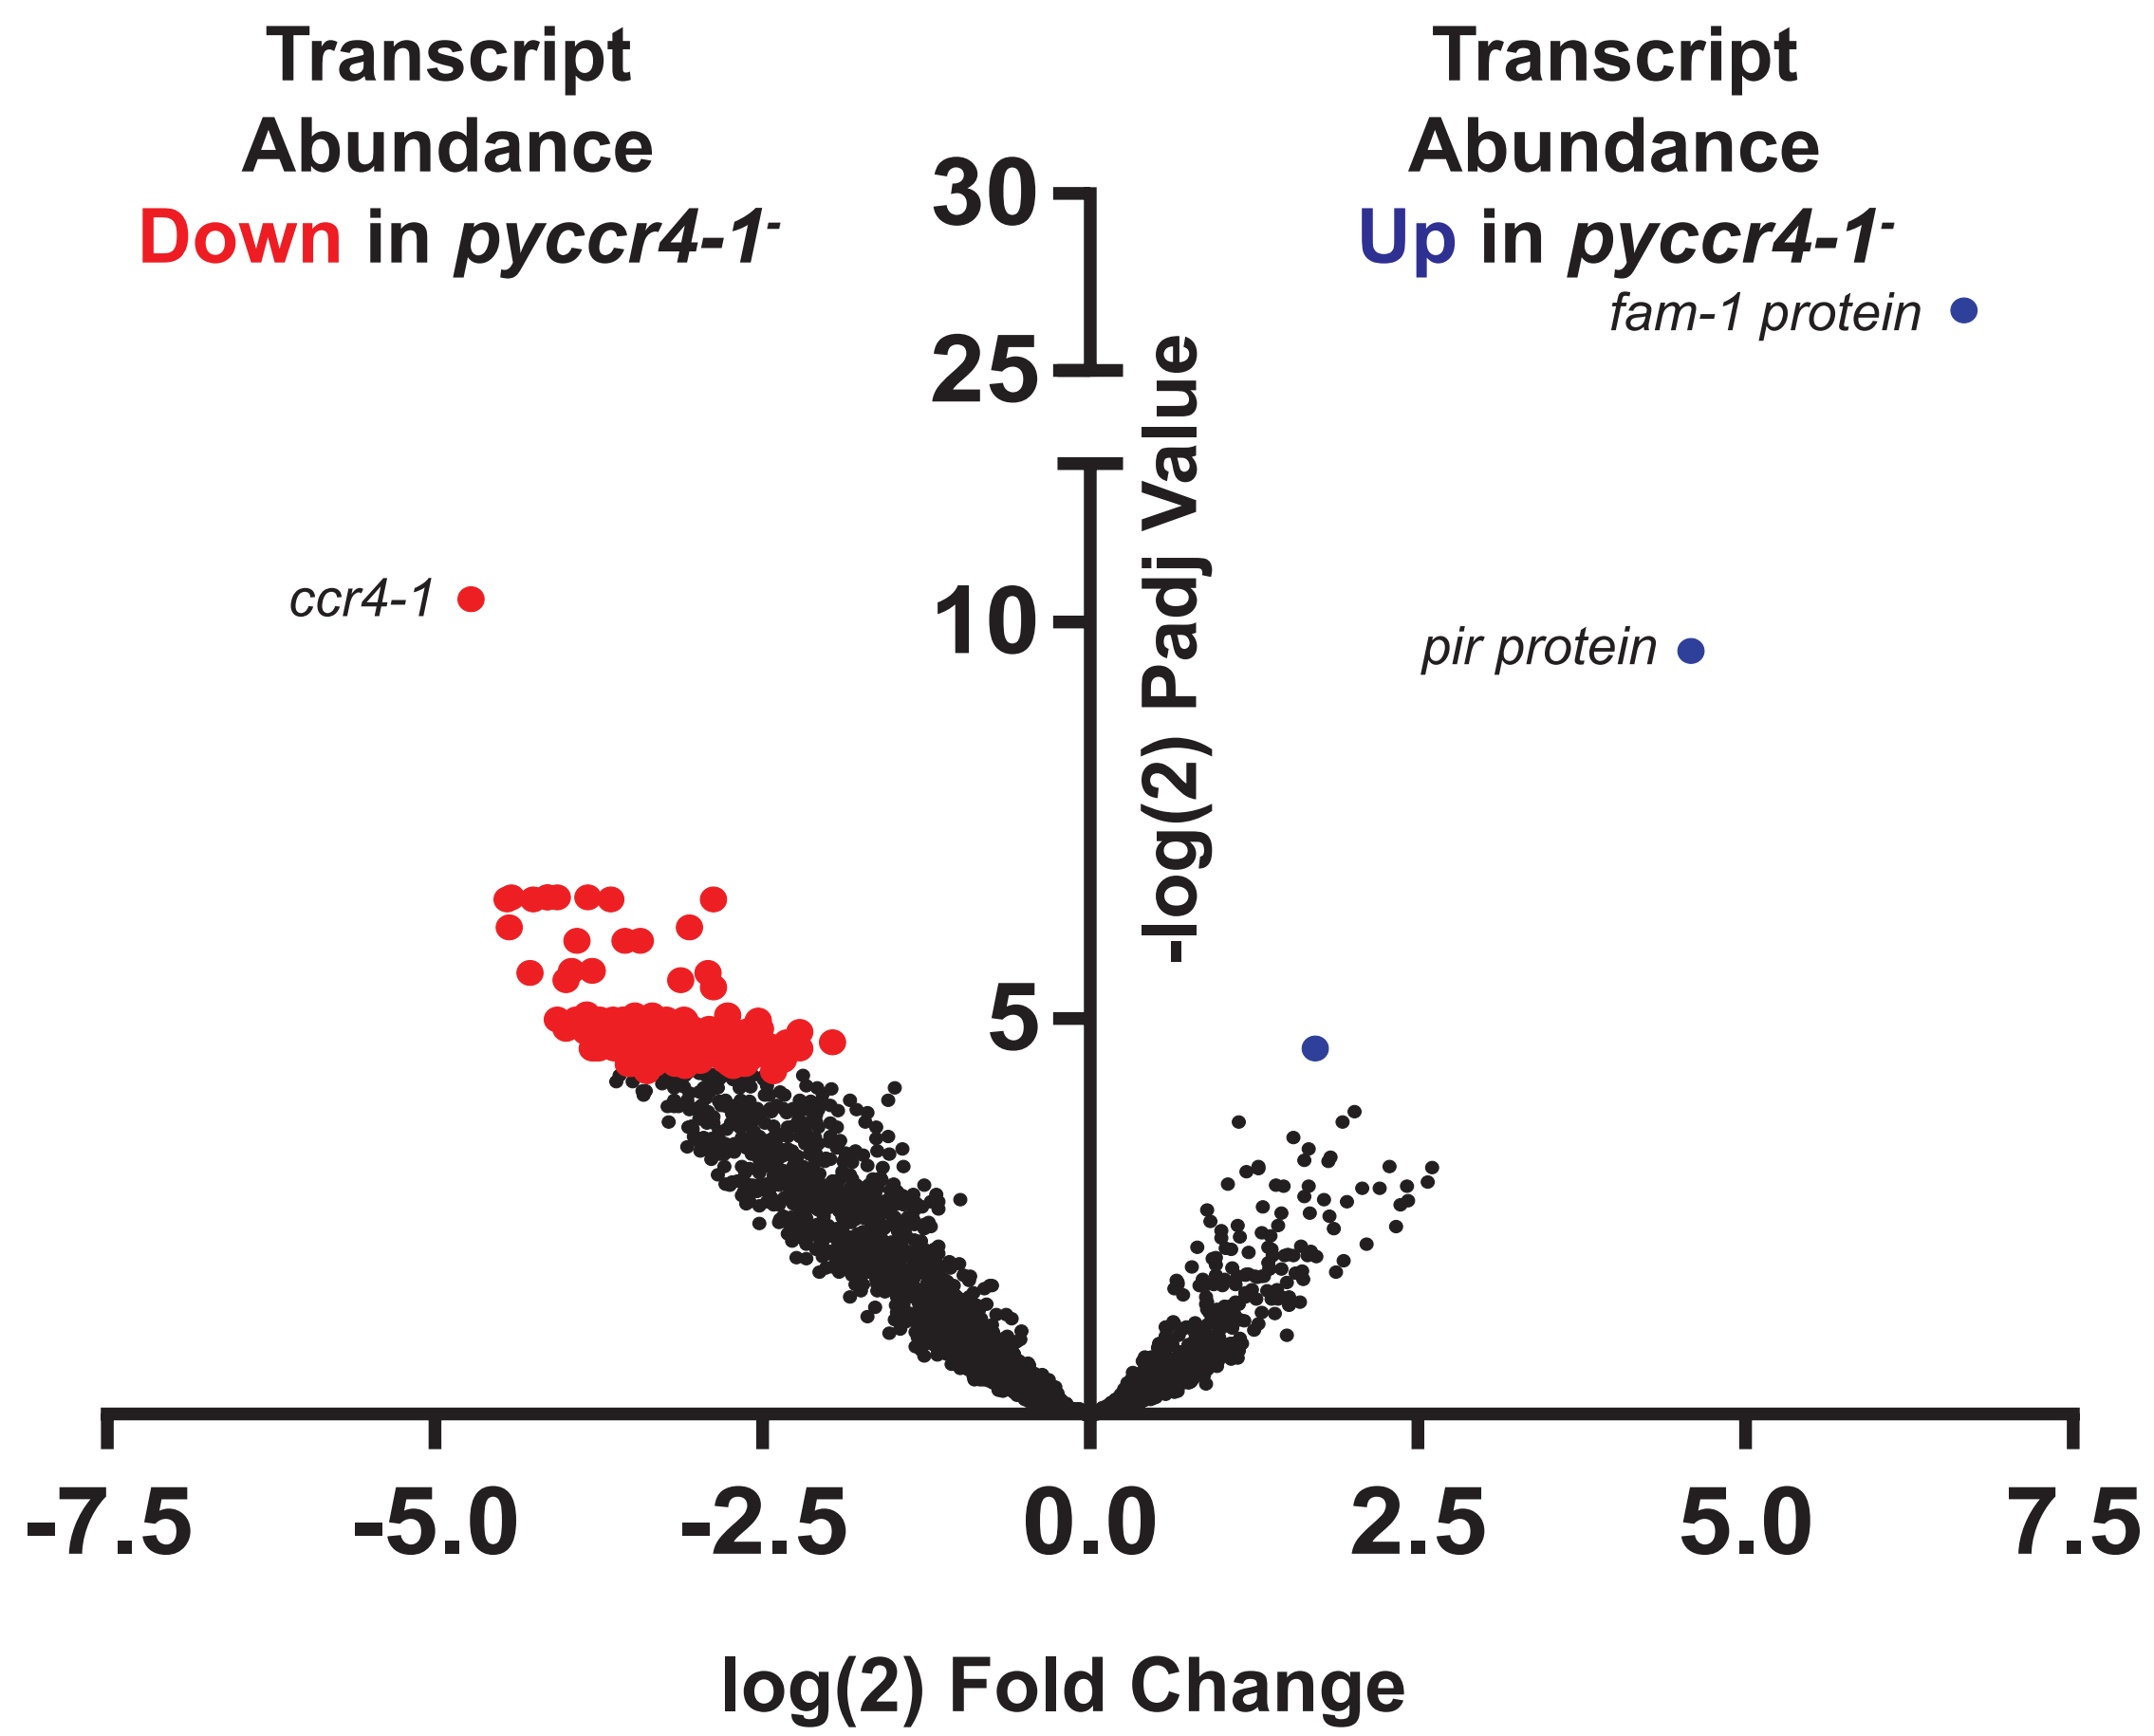

bioRxiv preprint doi: <https://doi.org/10.1101/350116>; this version posted June 18, 2018. The copyright holder for this preprint (which was not certified by peer review) is the author/funder, who has granted bioRxiv a license to display the preprint in perpetuity. It is made available under aCC-BY 4.0 International license.

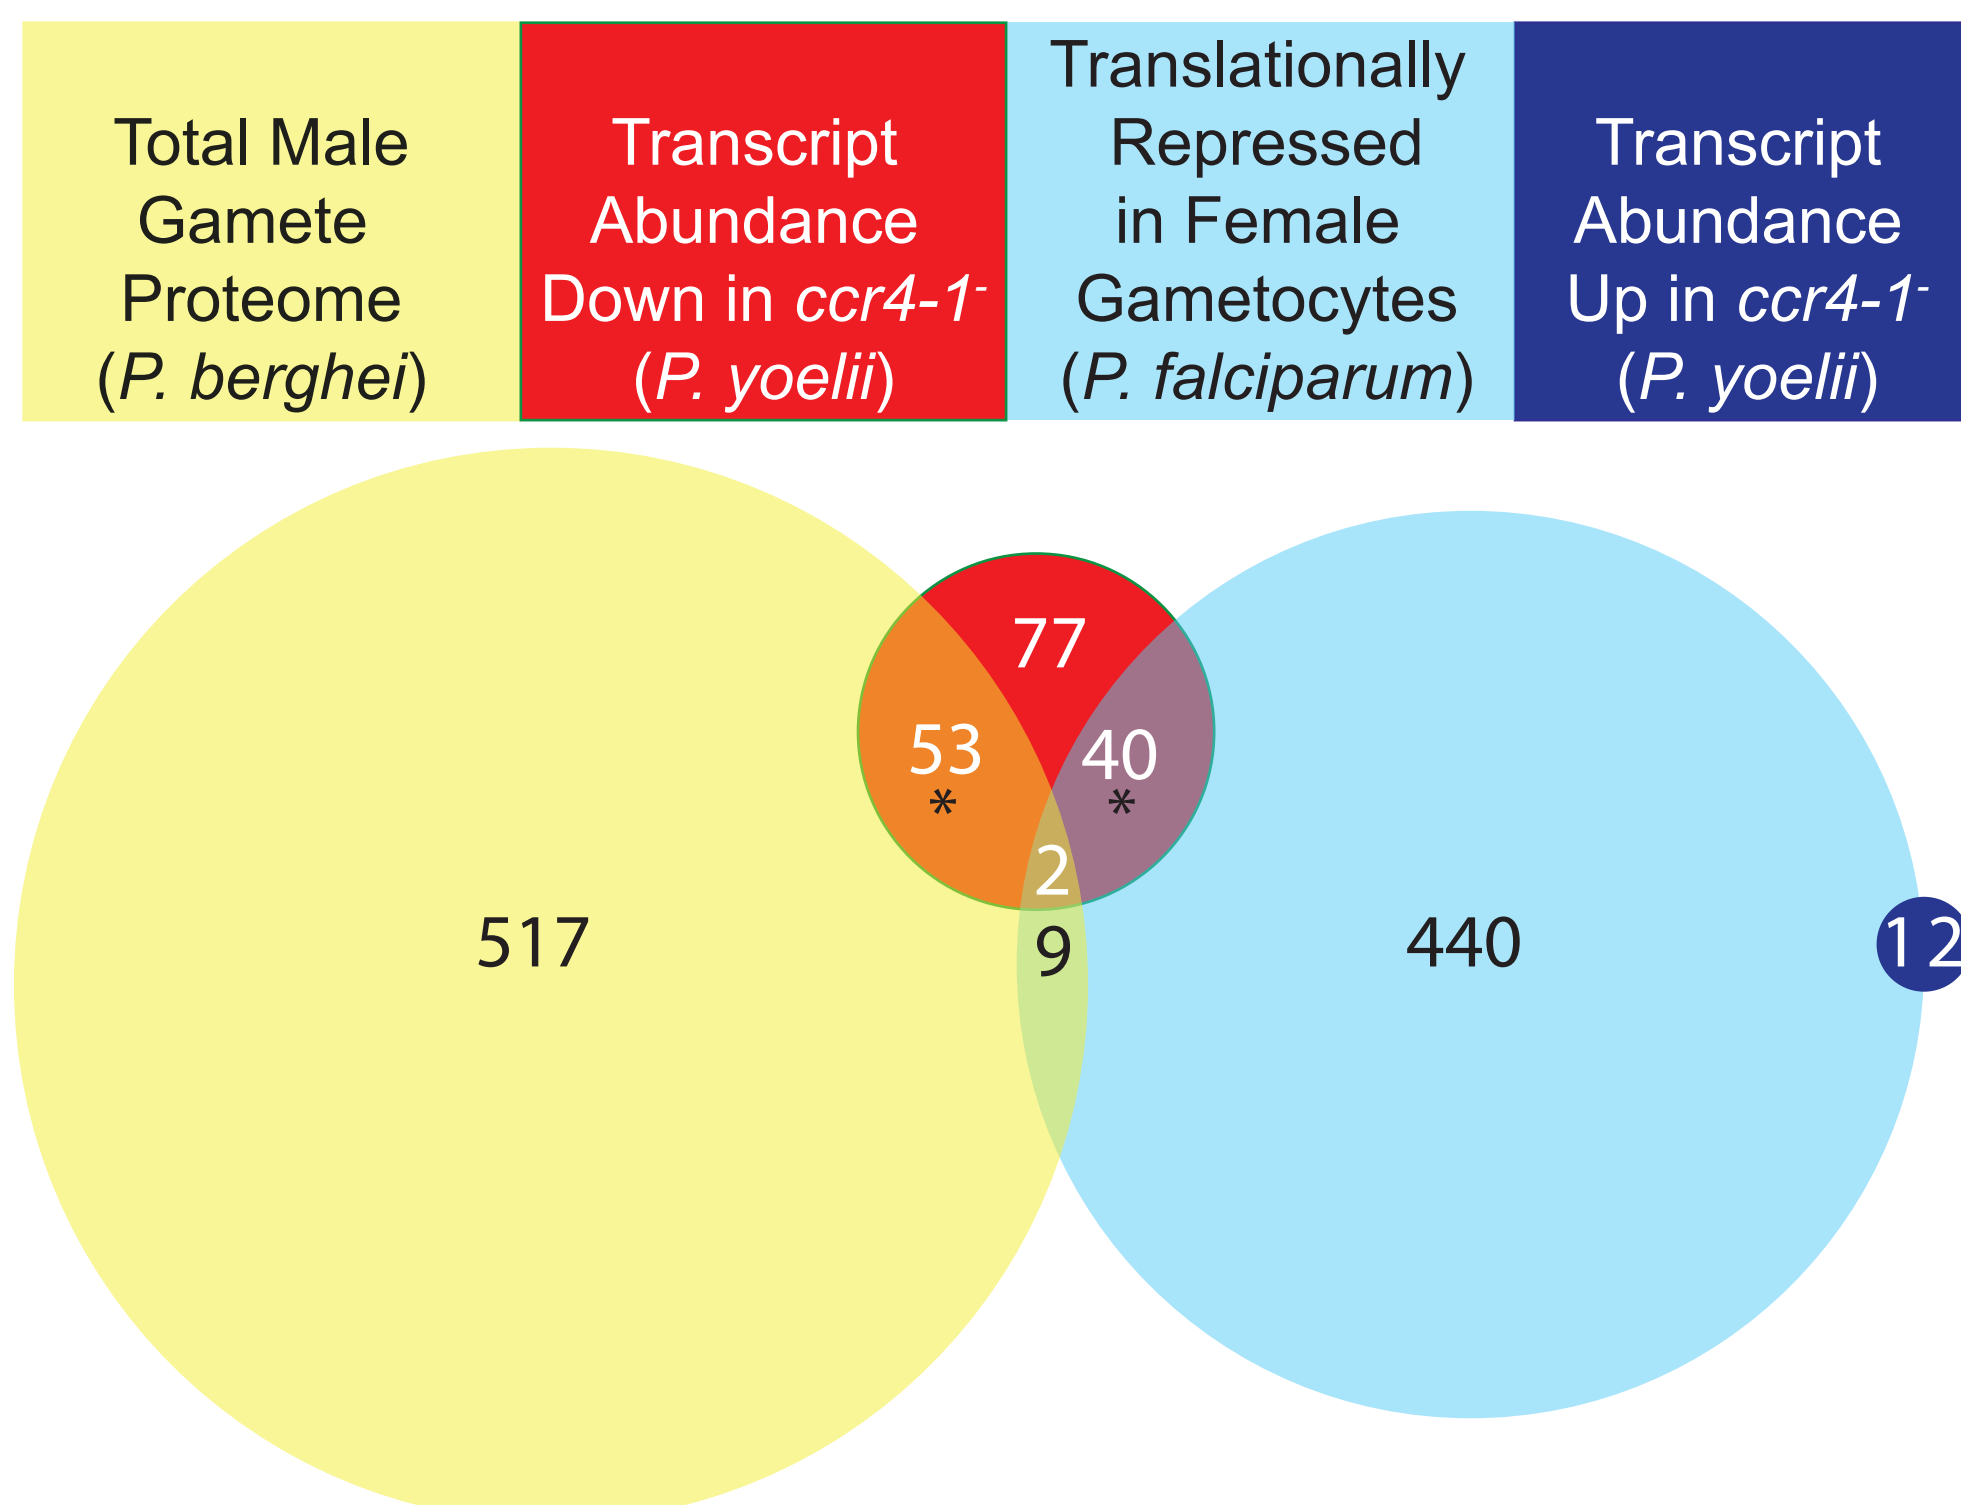

A.

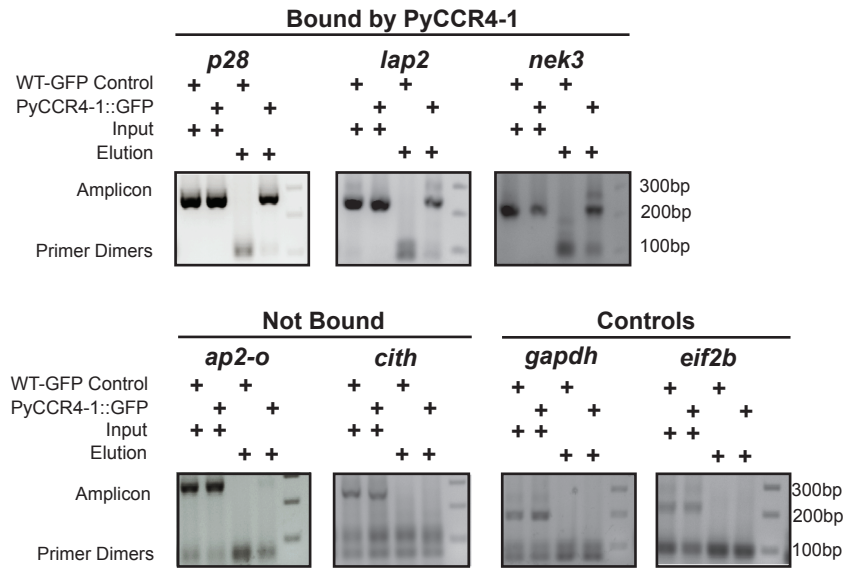

B.

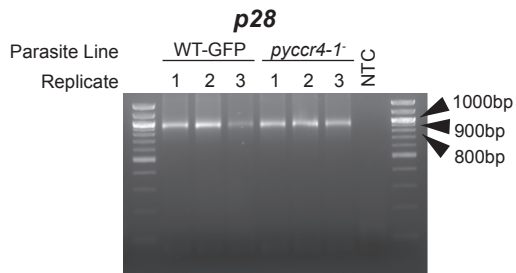

C.

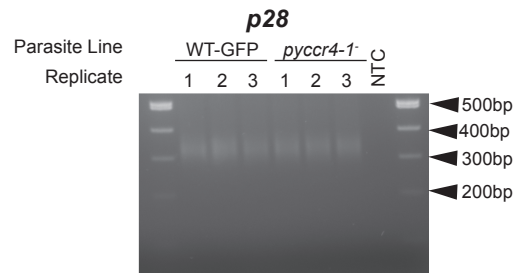

Figure 6. Hart et al

The CAF1/CCR4/NOT Complex of *Plasmodium*

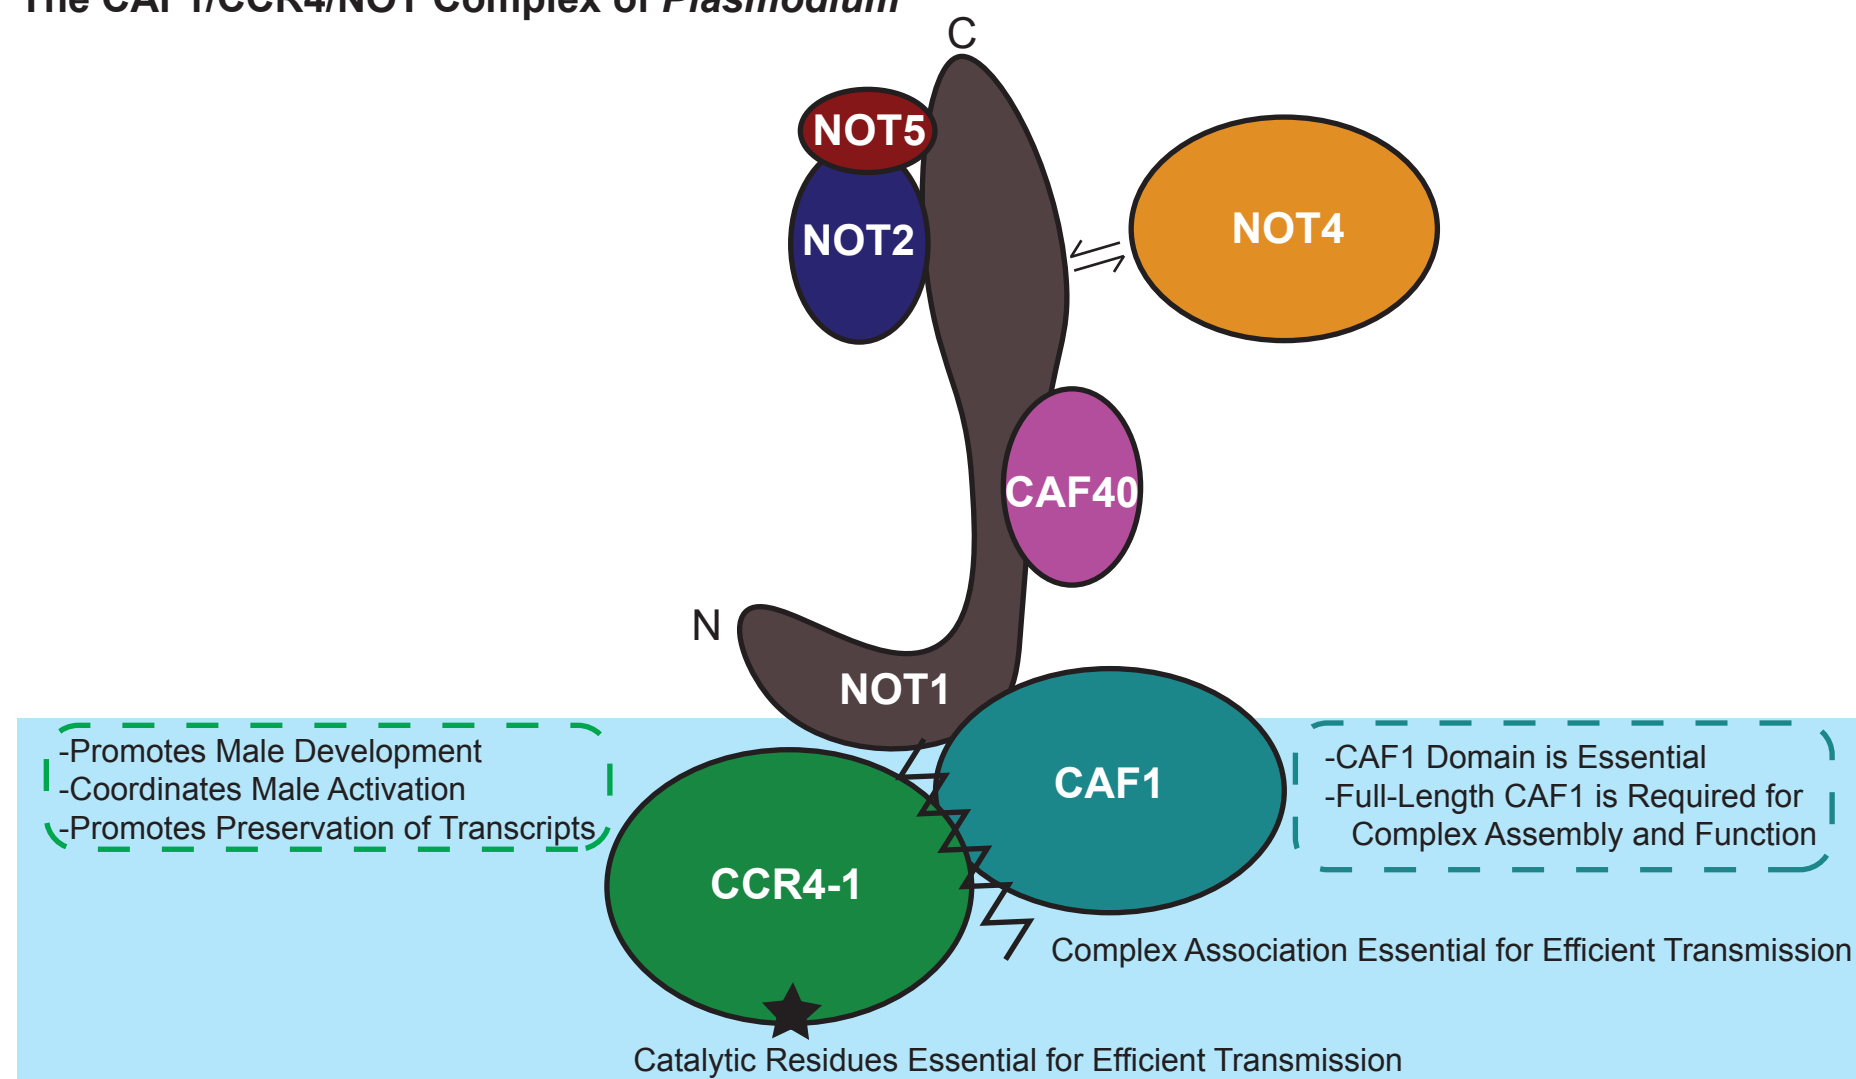

Source: https://www.biorxiv.org/content/10.1101/350116v1.full.pdf
